# Supplementary material for: Prostate lineage-specific metabolism governs luminal differentiation and response to antiandrogen treatment
Source: PubMed Central journal article supplement (PMC10709144; doi:10.1038/s41556-023-01274-x), 2023-12-04

Figure 2d

KRT8

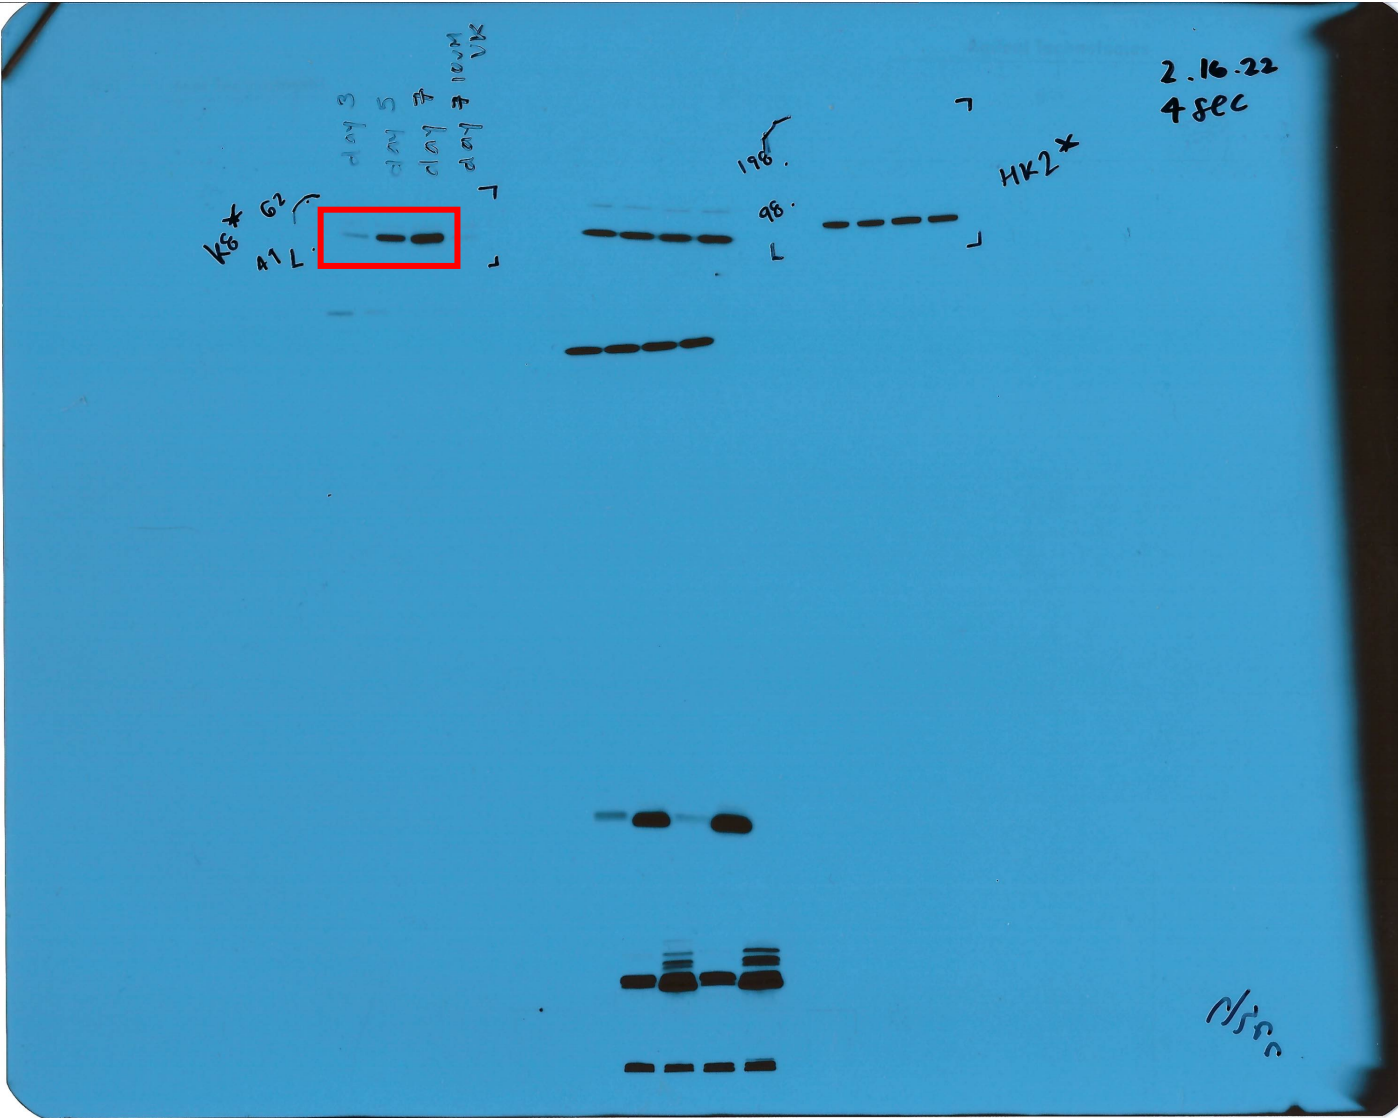

Figure 2d

p63

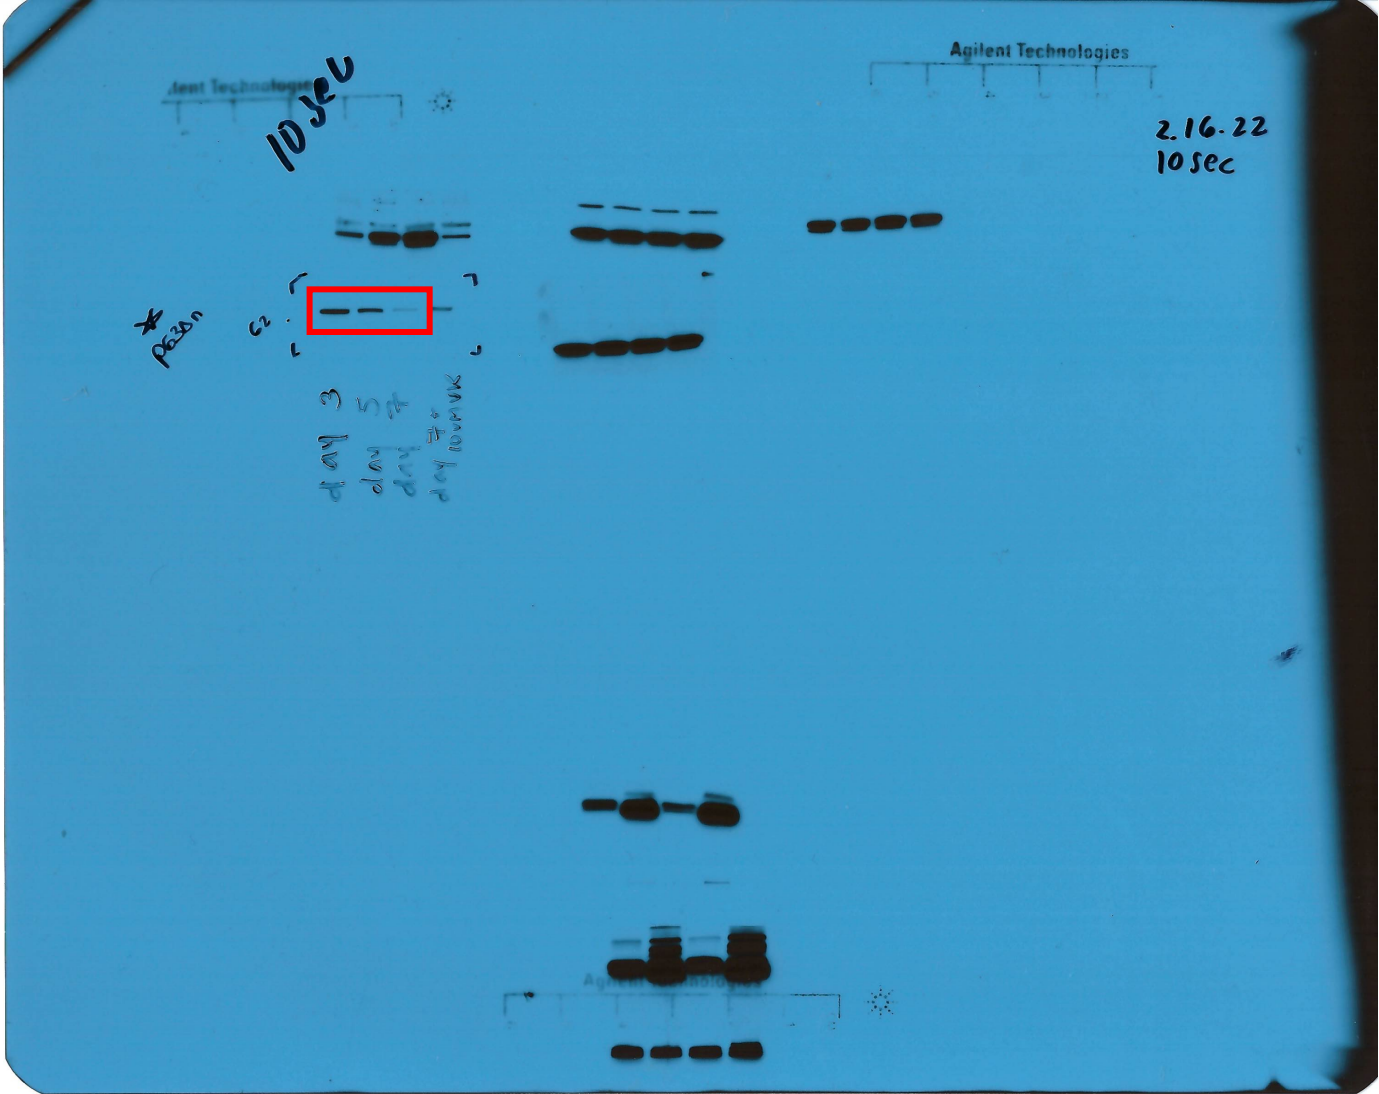

Figure 2d

Actin

Basal-derived organoid day 3  
Basal-derived organoid day 5  
Basal-derived organoid day 7  
Basal-derived organoid day 7 10uM UK5099

49 kDa

38 kDa

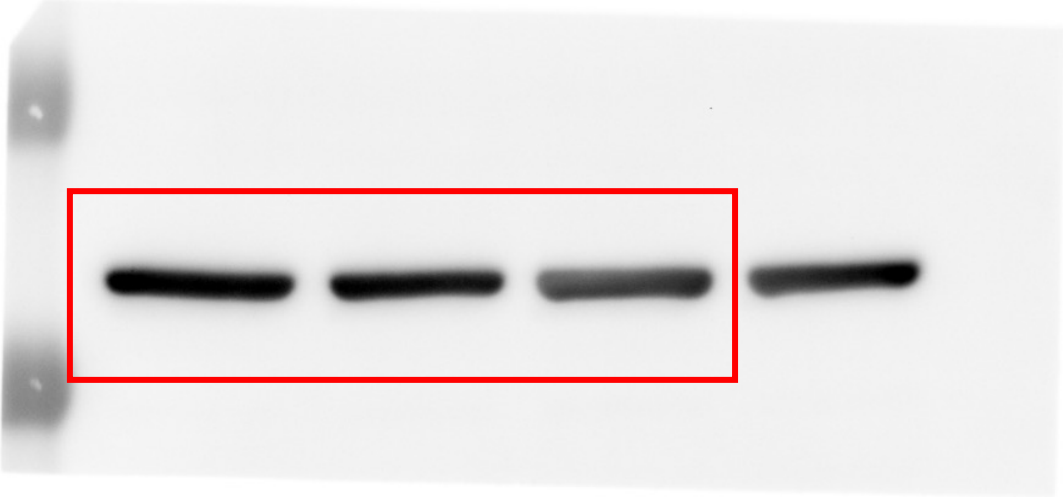

Figure 3d

AR

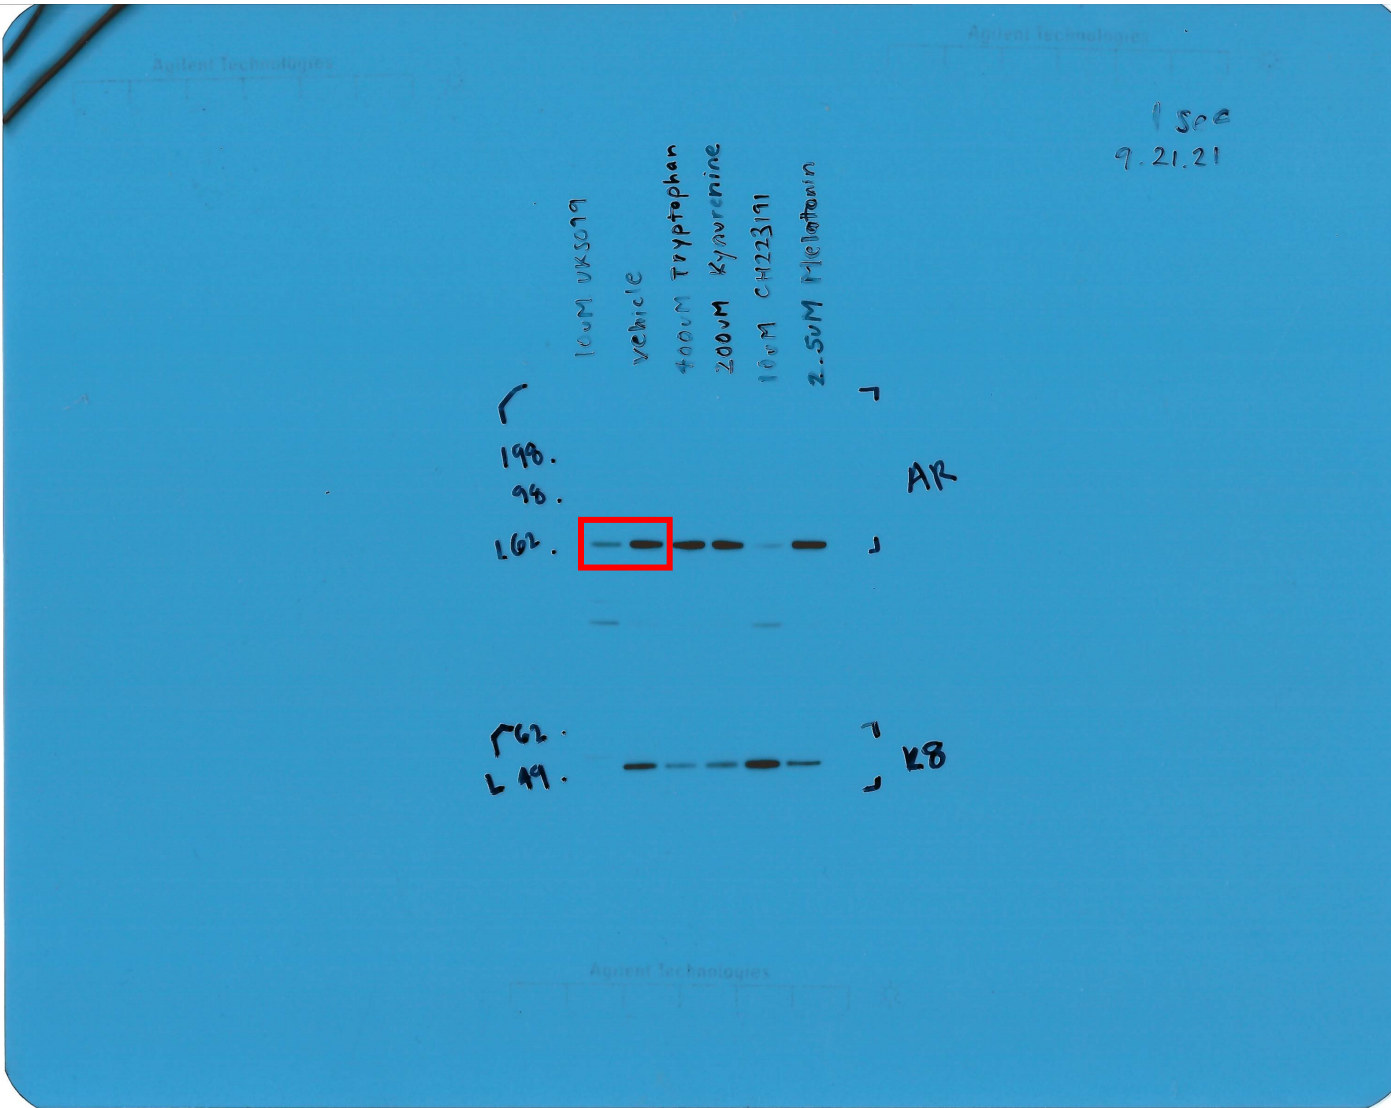





Figure 3d

p63

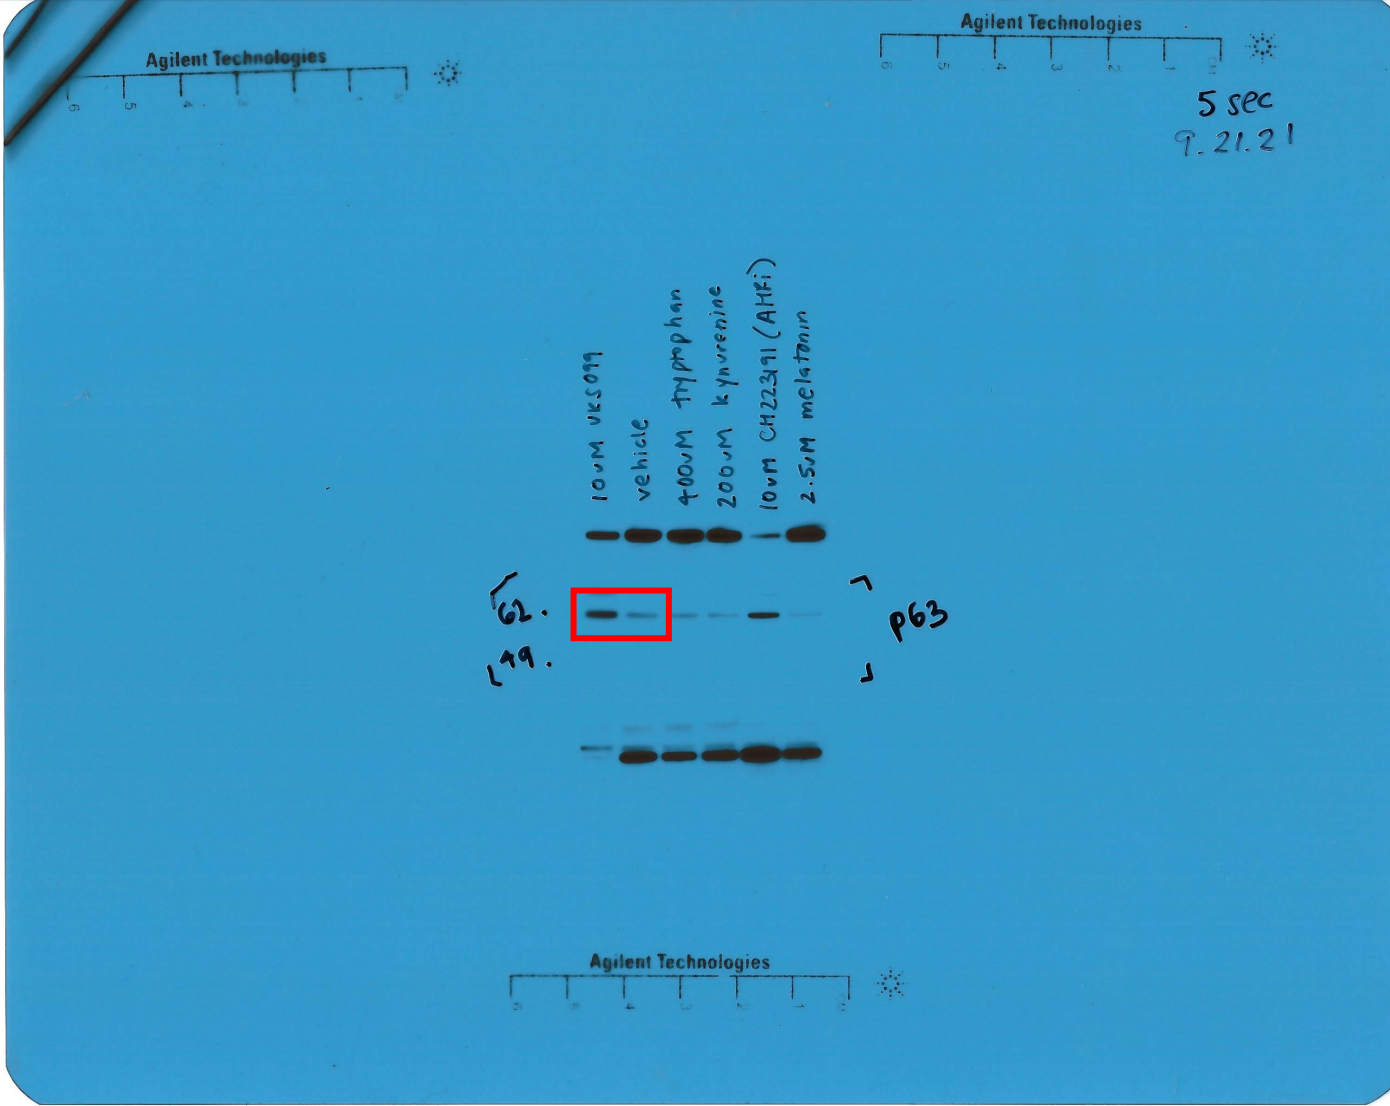

Figure 3d

Vinculin

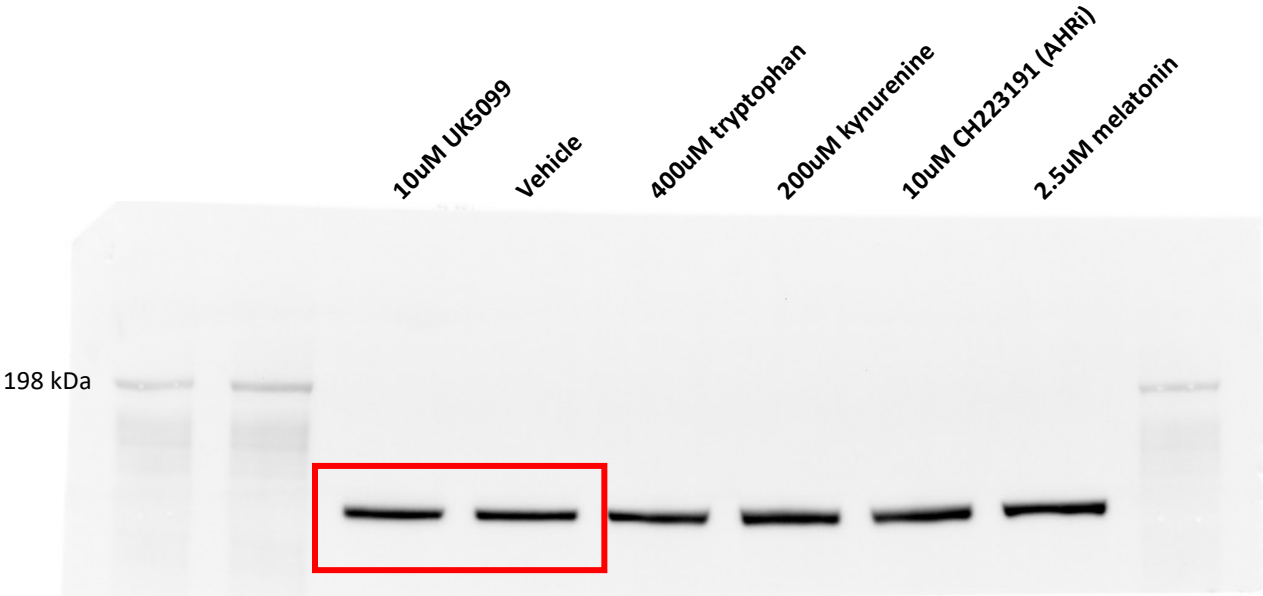





Figure 3i

p63

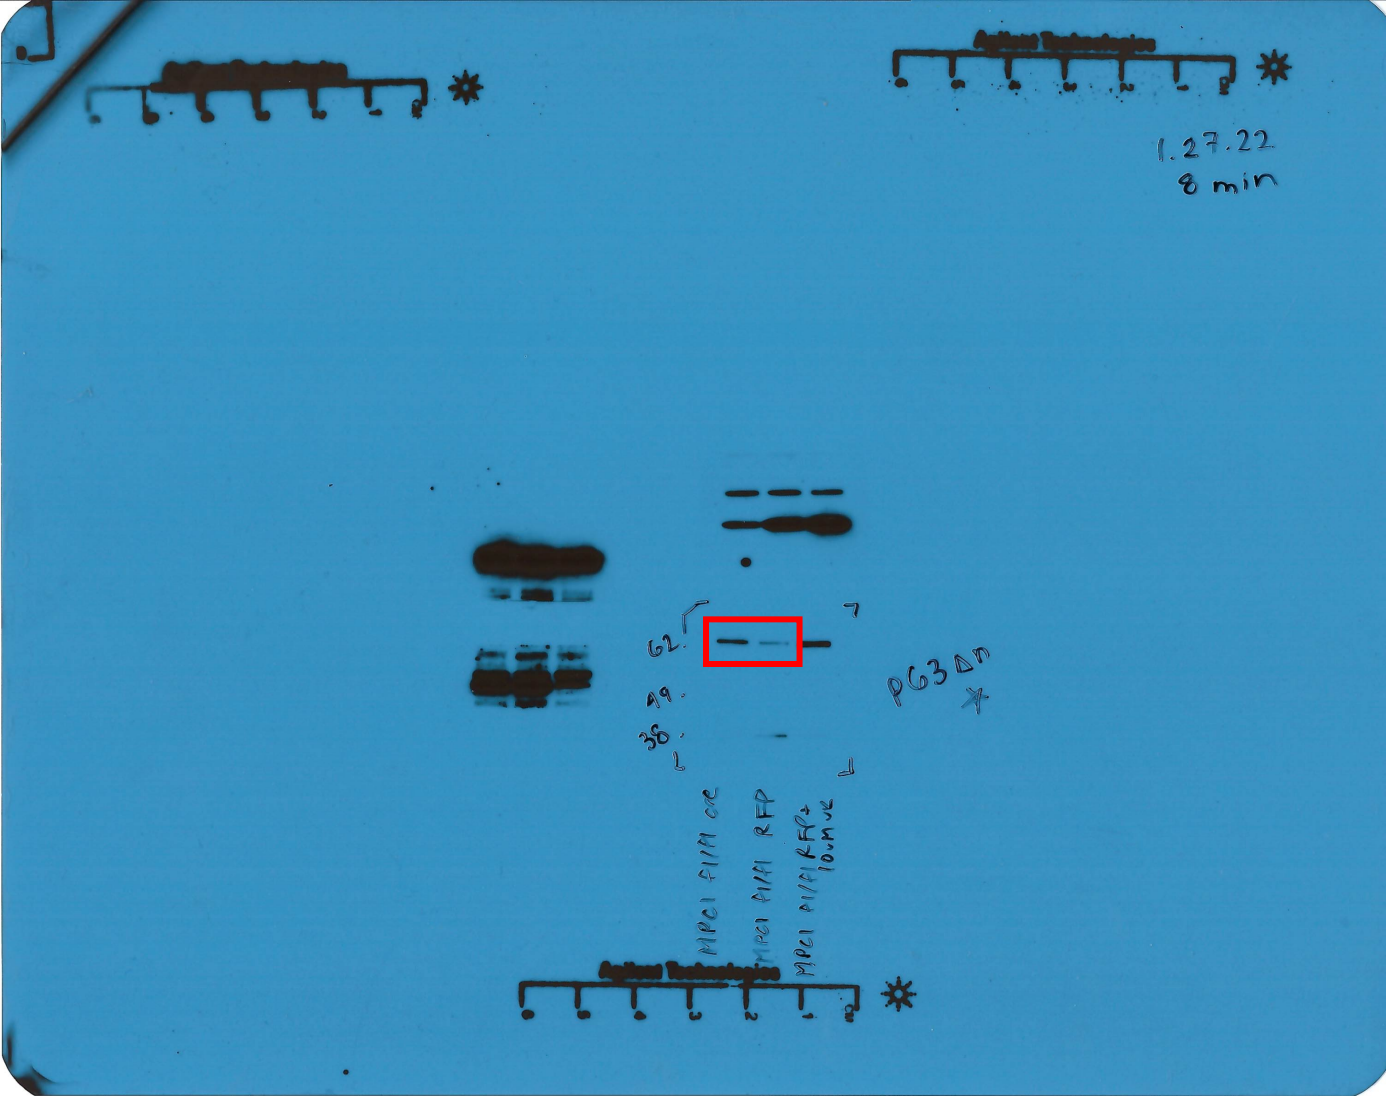



Figure 3i

MPC1

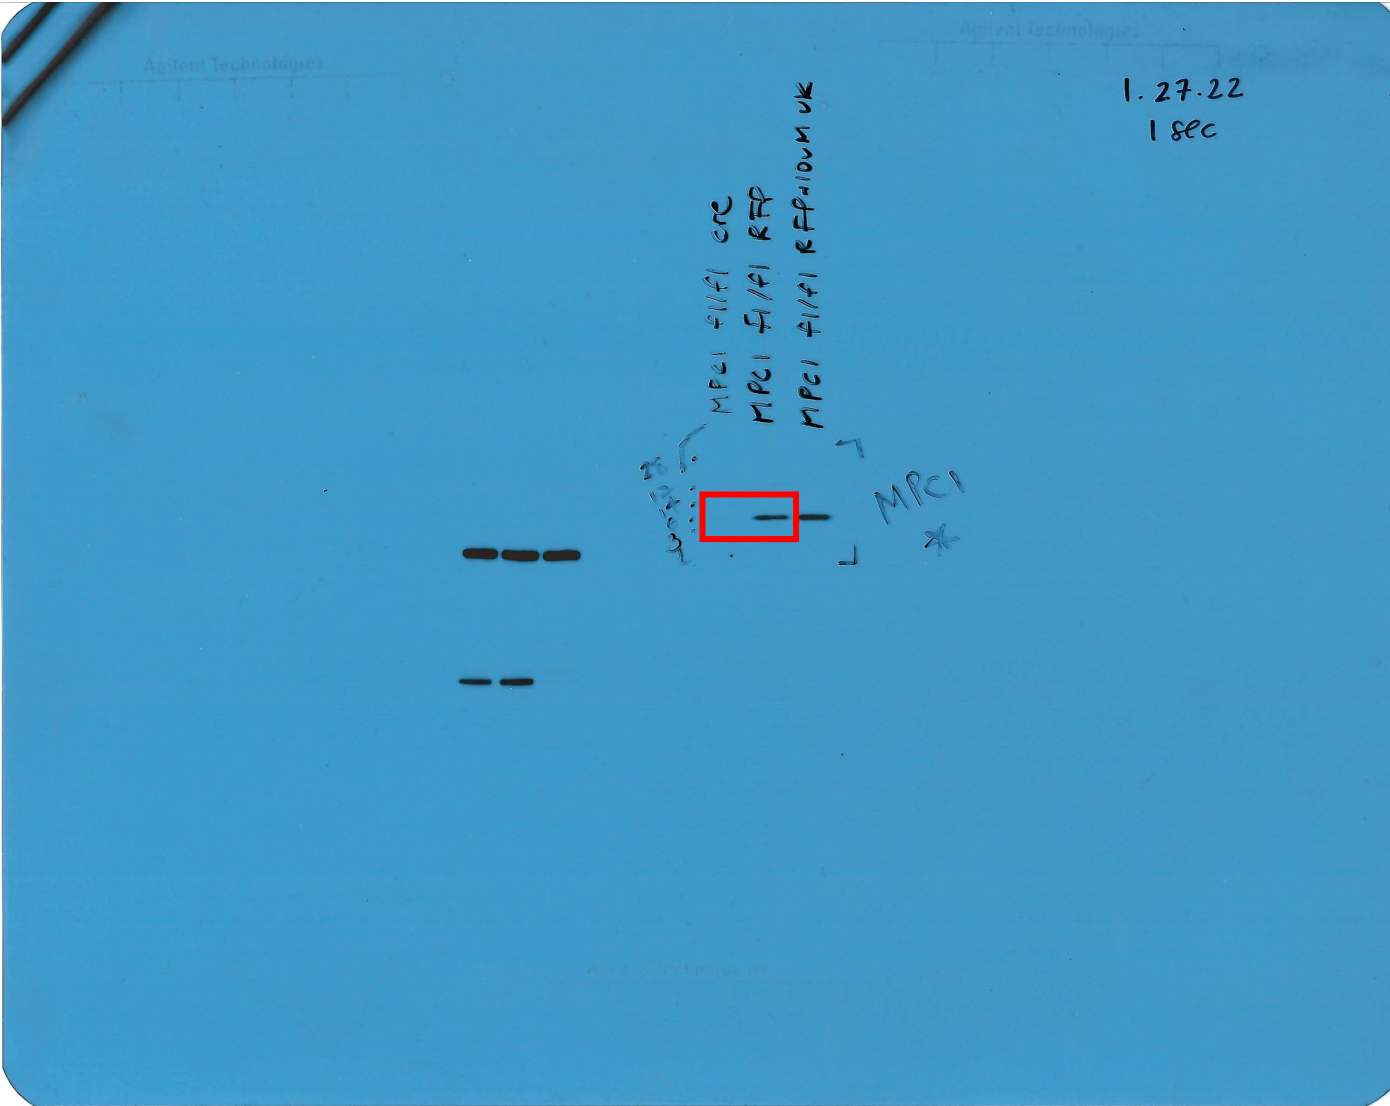

Figure 3i

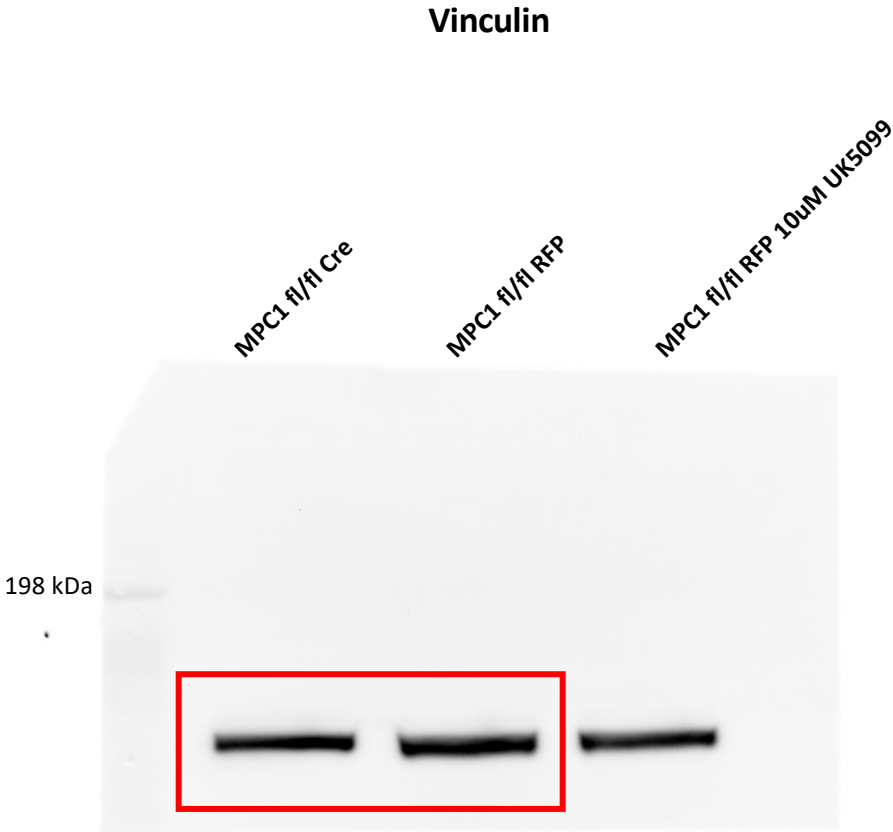

Figure 4a

KRT8

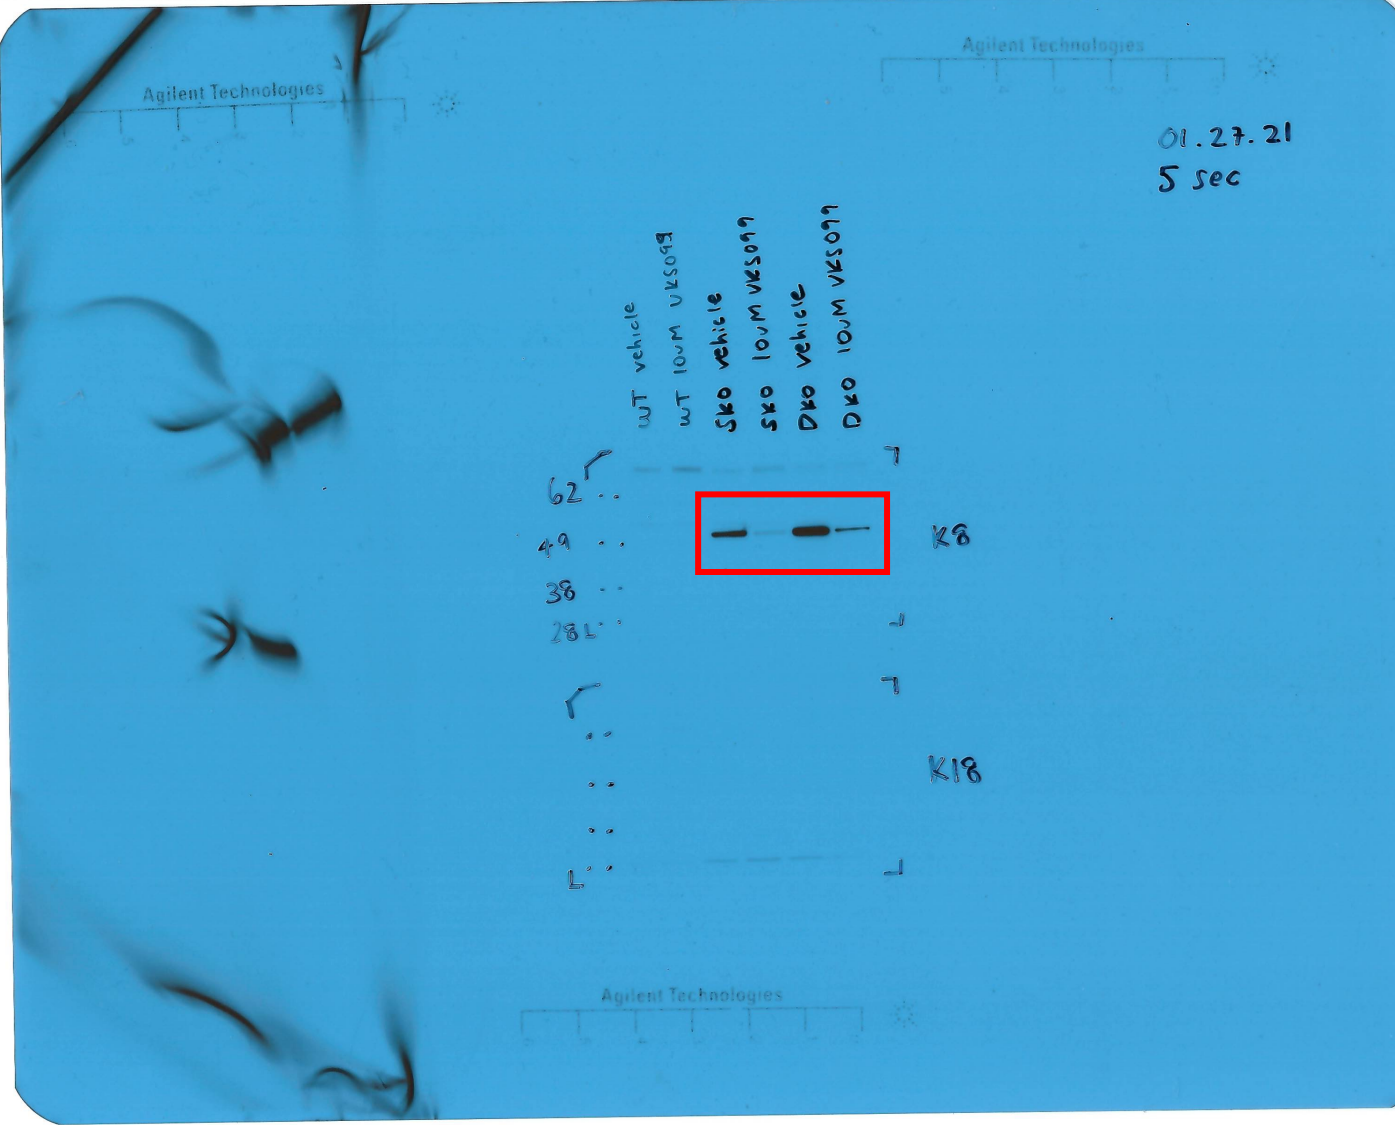

Figure 4a

KRT18

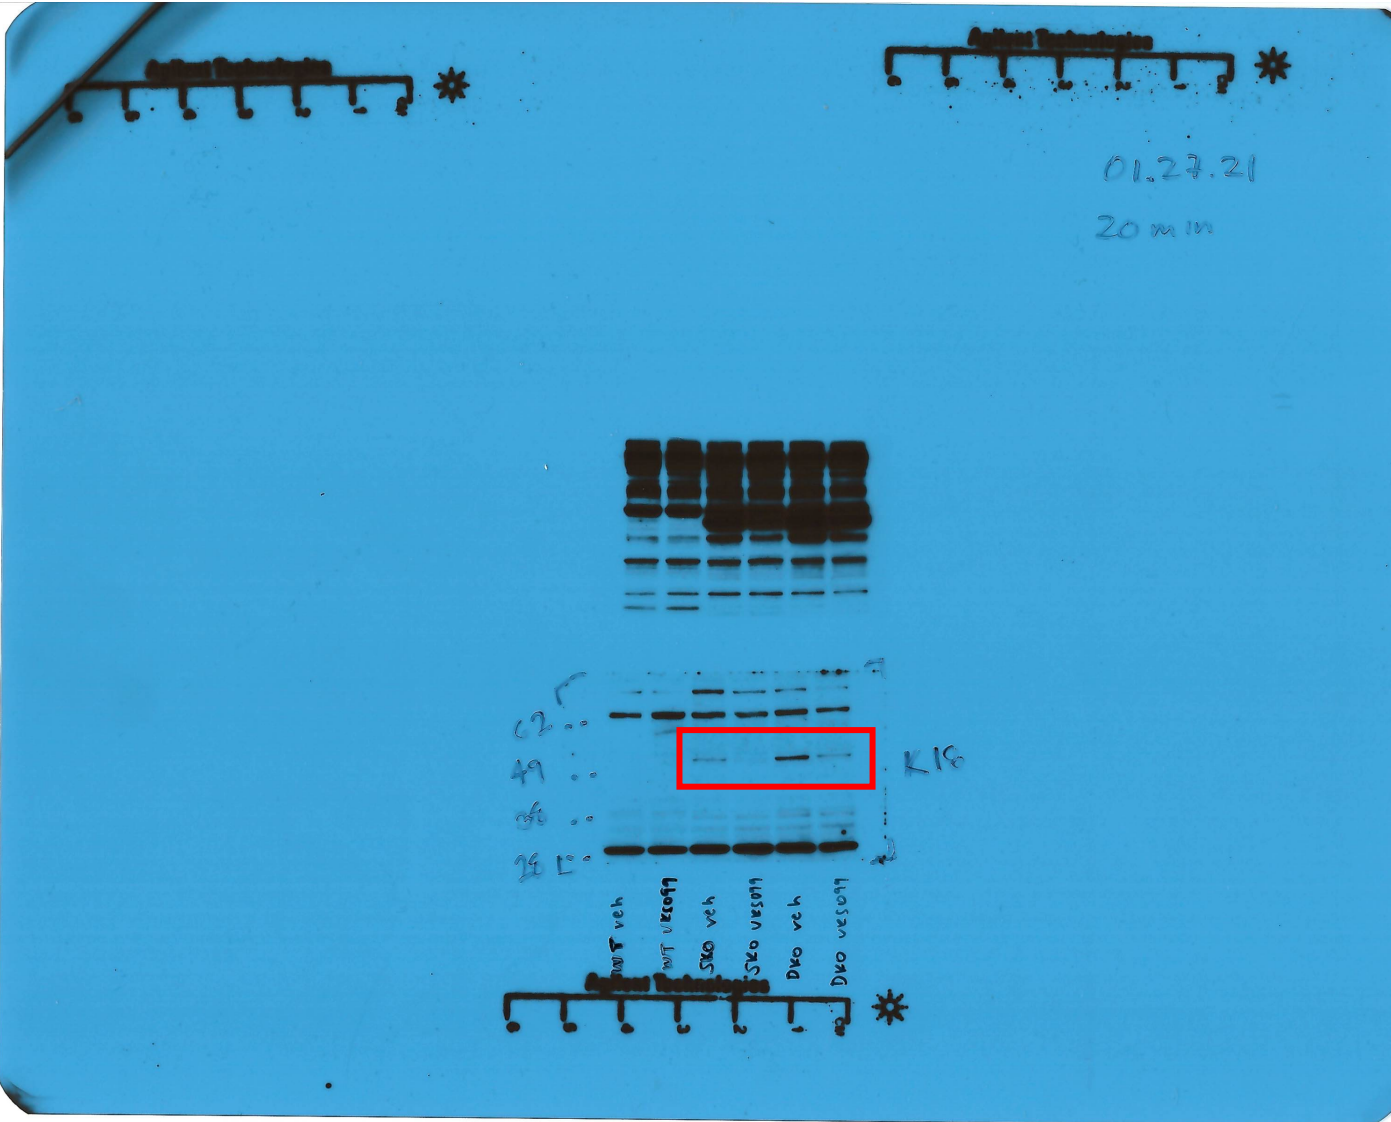

Figure 4a

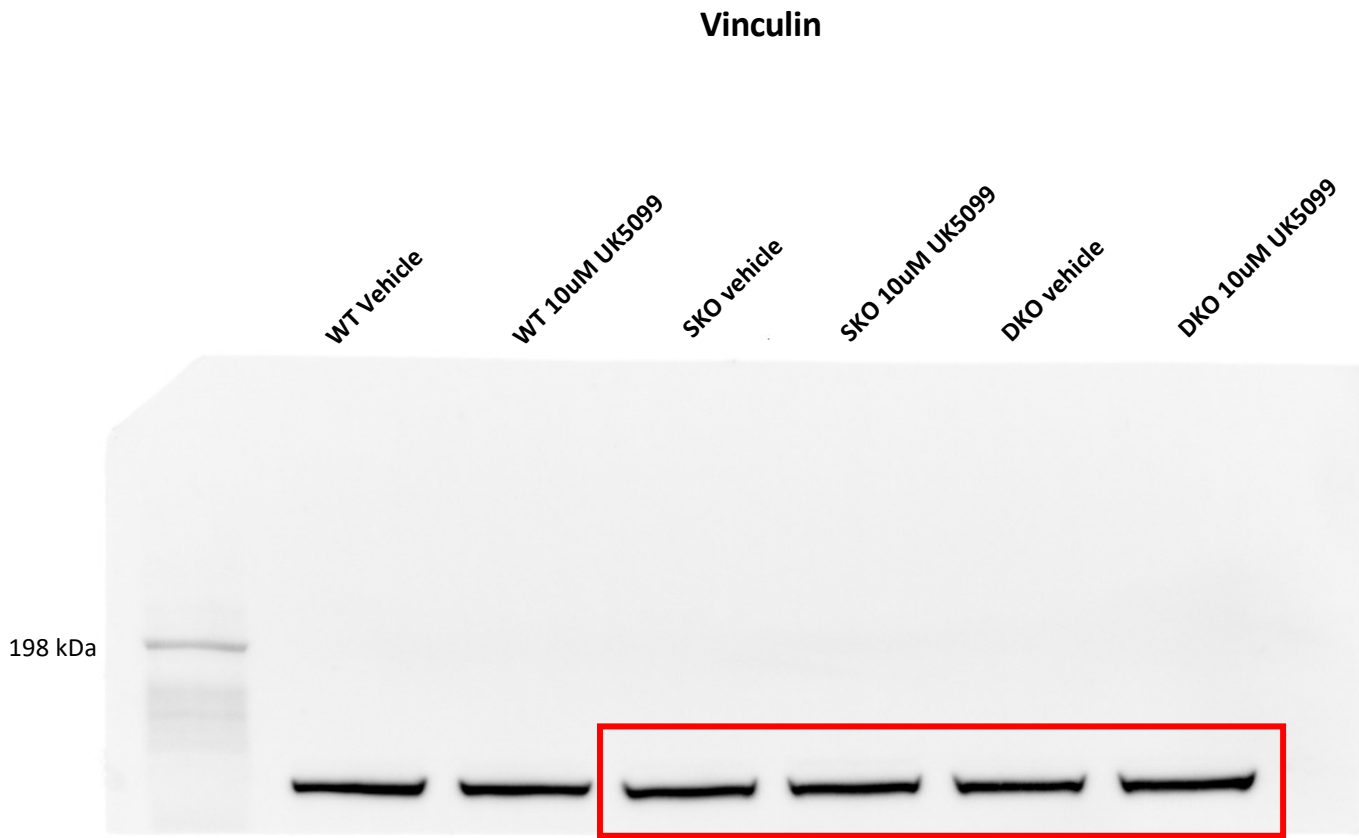



Figure 5b

KRT8

7.8.22

2 sec -

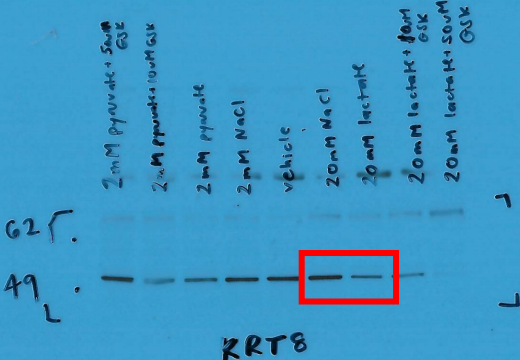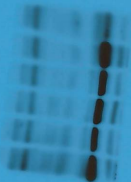

\*

Figure 5b

p63

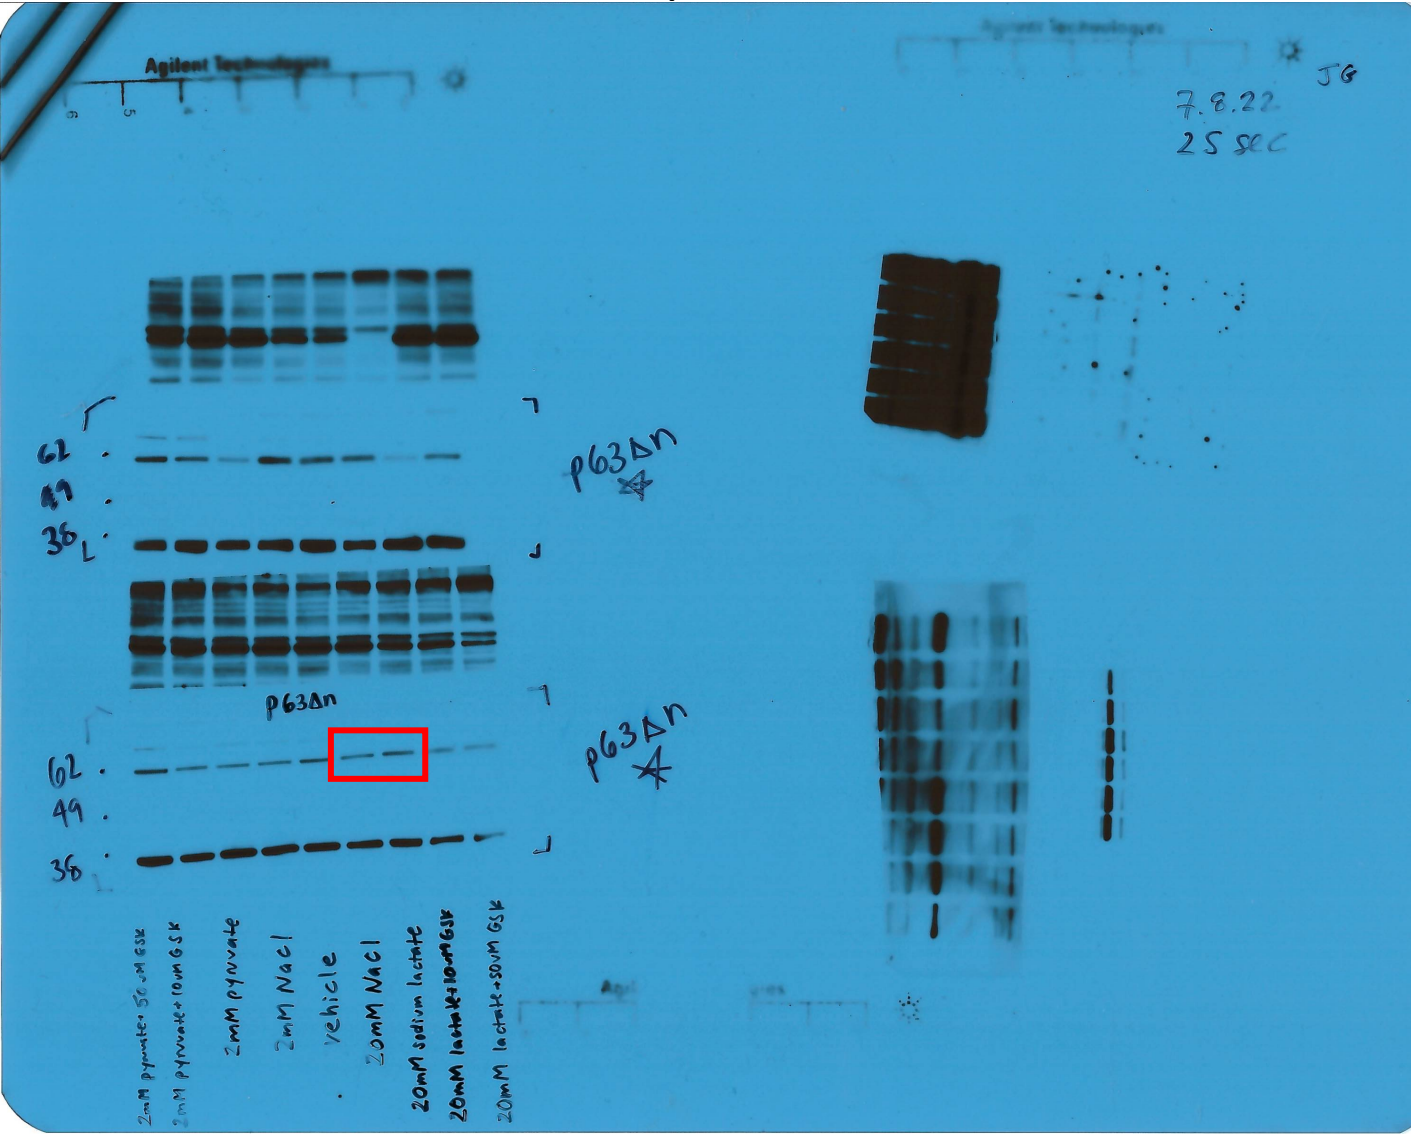

Figure 5b

Actin

2mM pyruvate + 50uM GSK  
2mM pyruvate + 10uM GSK  
2mM pyruvate  
2mM NaCl  
Vehicle  
20mM NaCl  
20mM lactate  
20mM lactate + 10uM GSK  
20mM lactate + 50uM GSK

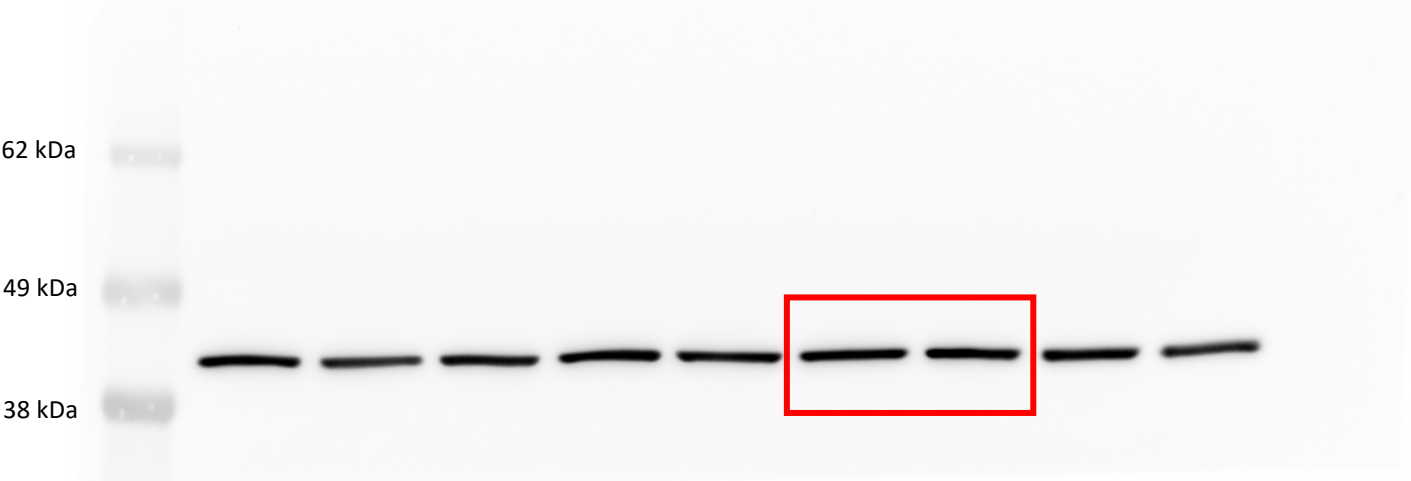

Figure 5c

KRT8

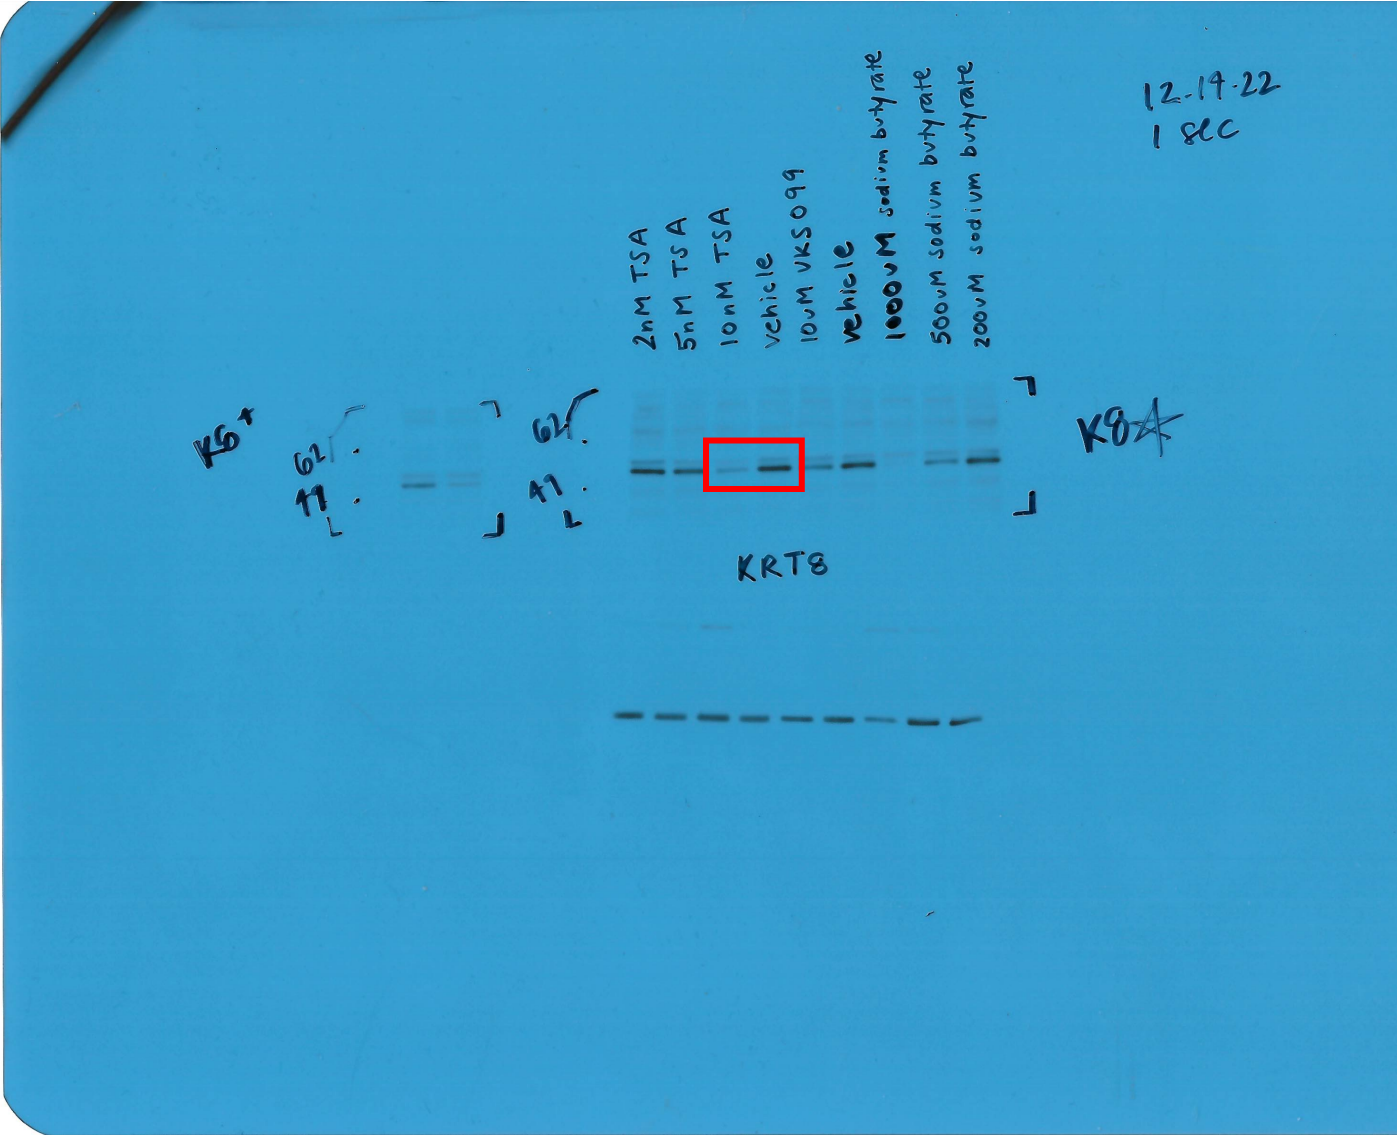



Figure 5c

p63

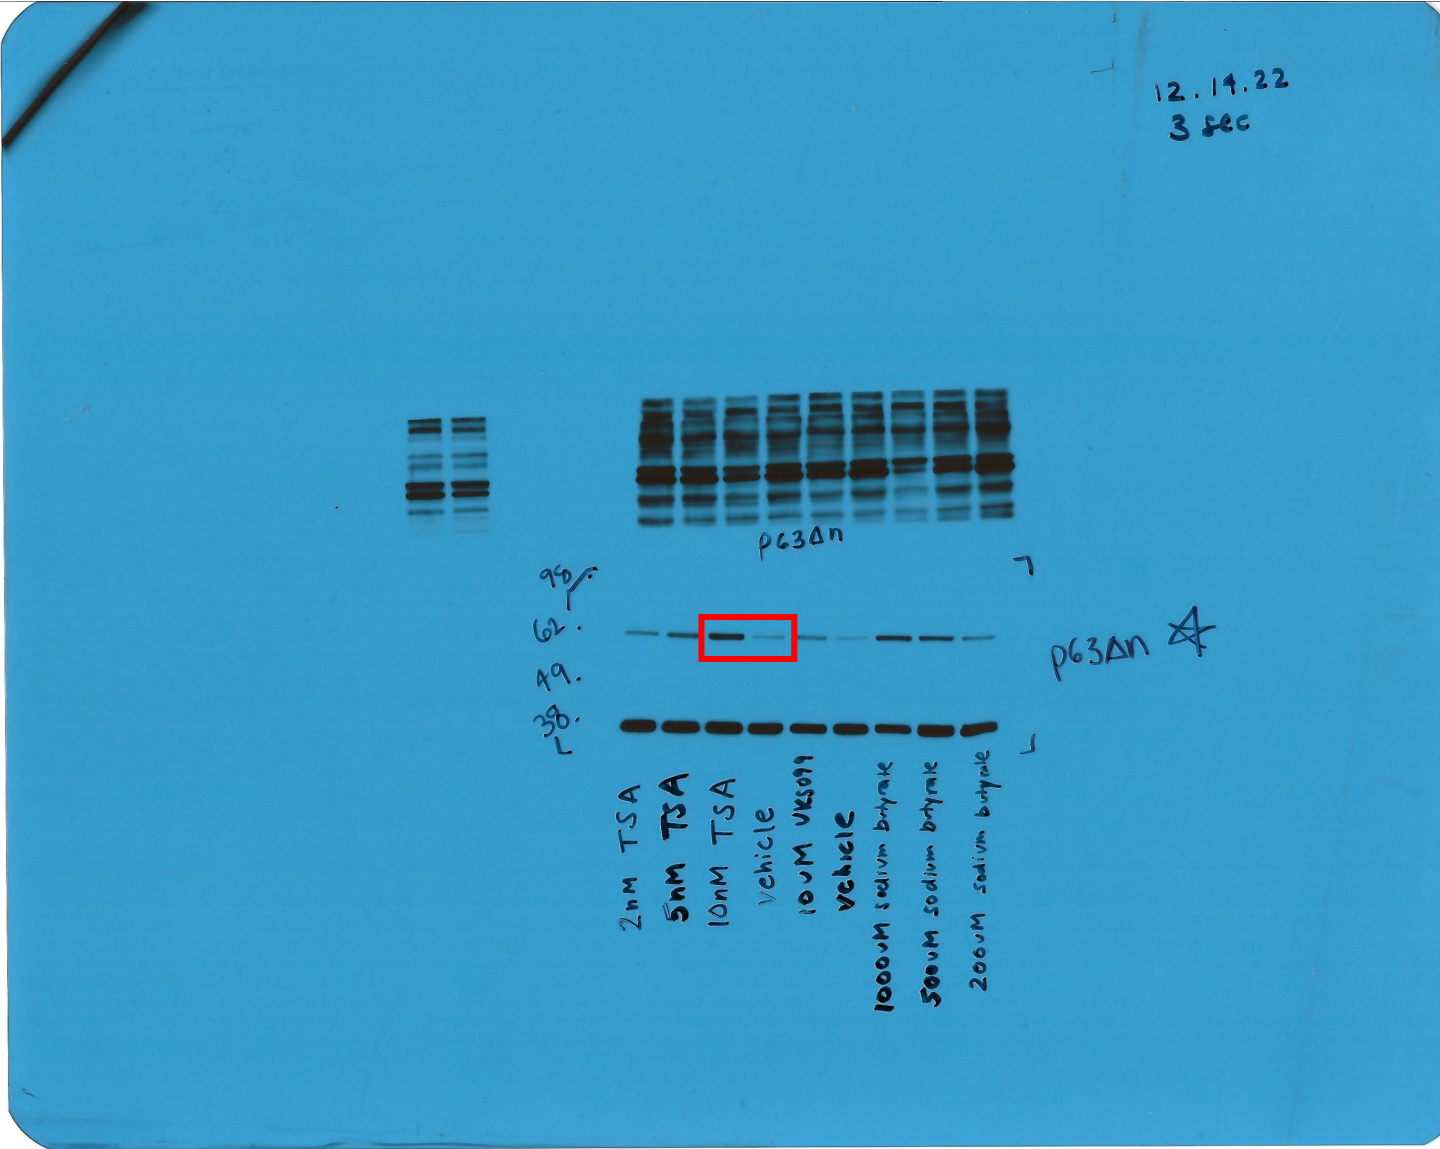



Figure 5c

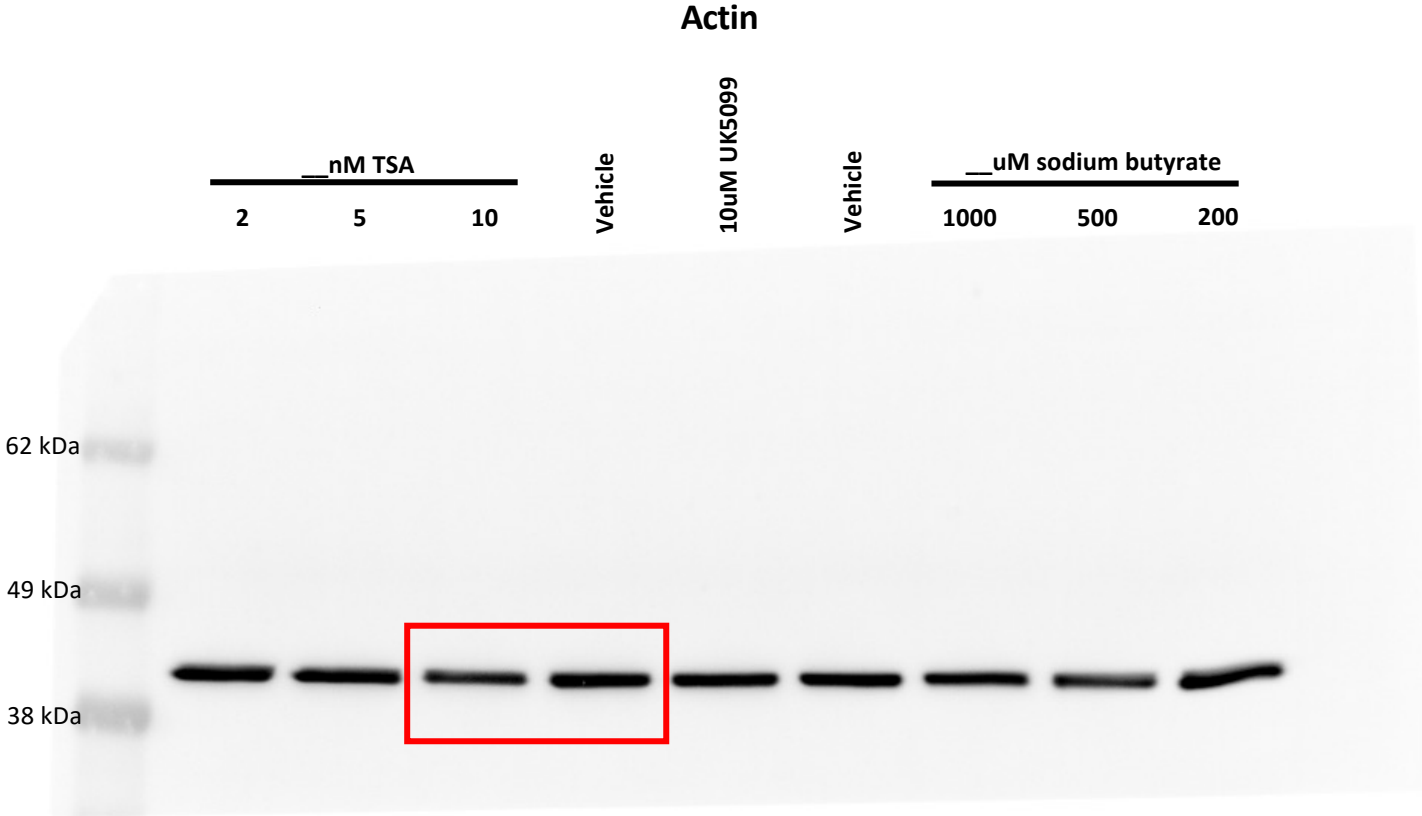

Figure 5d

KRT8

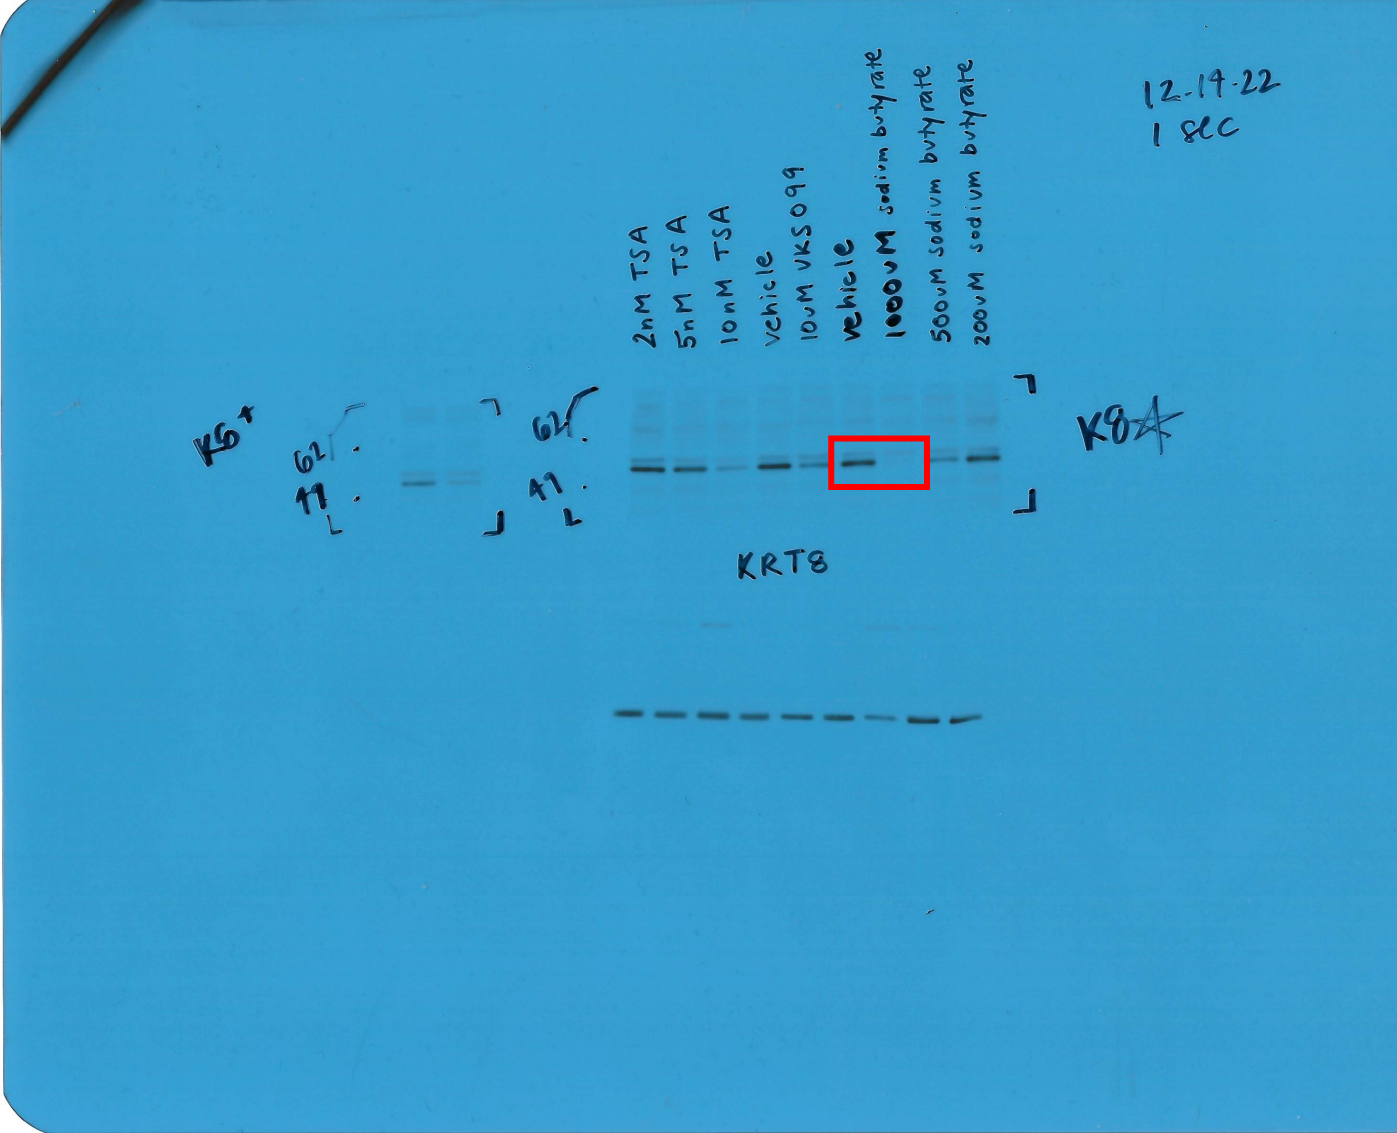

Figure 5d

p63

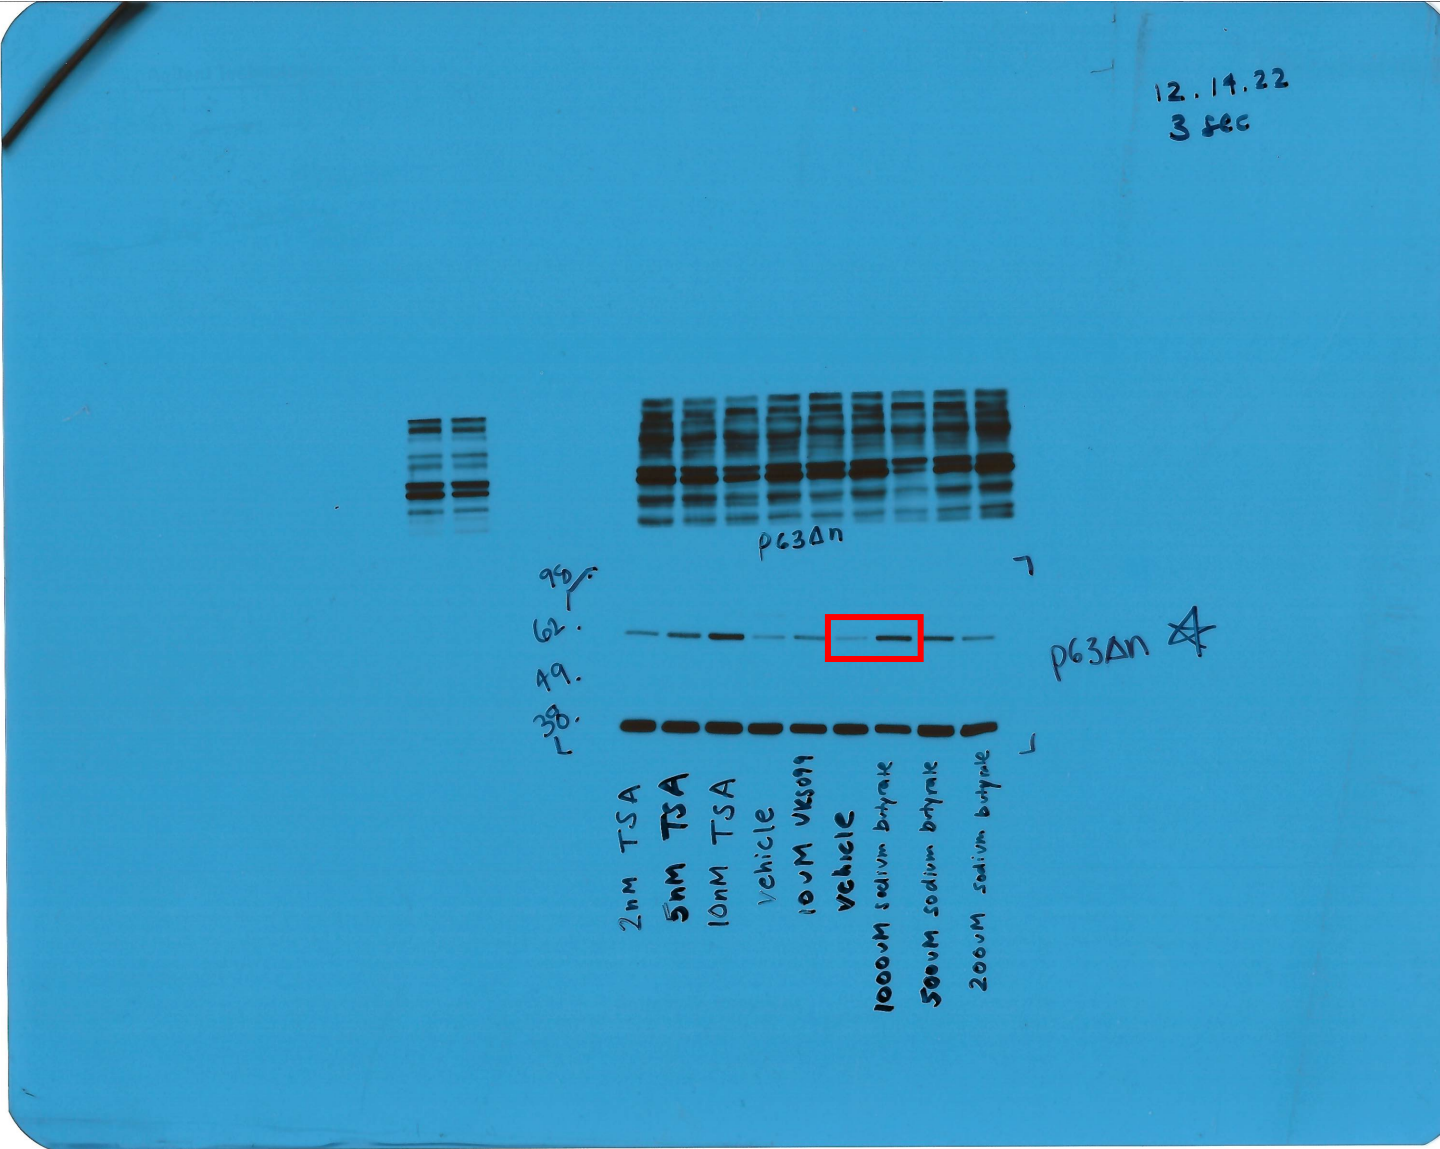

Figure 5d

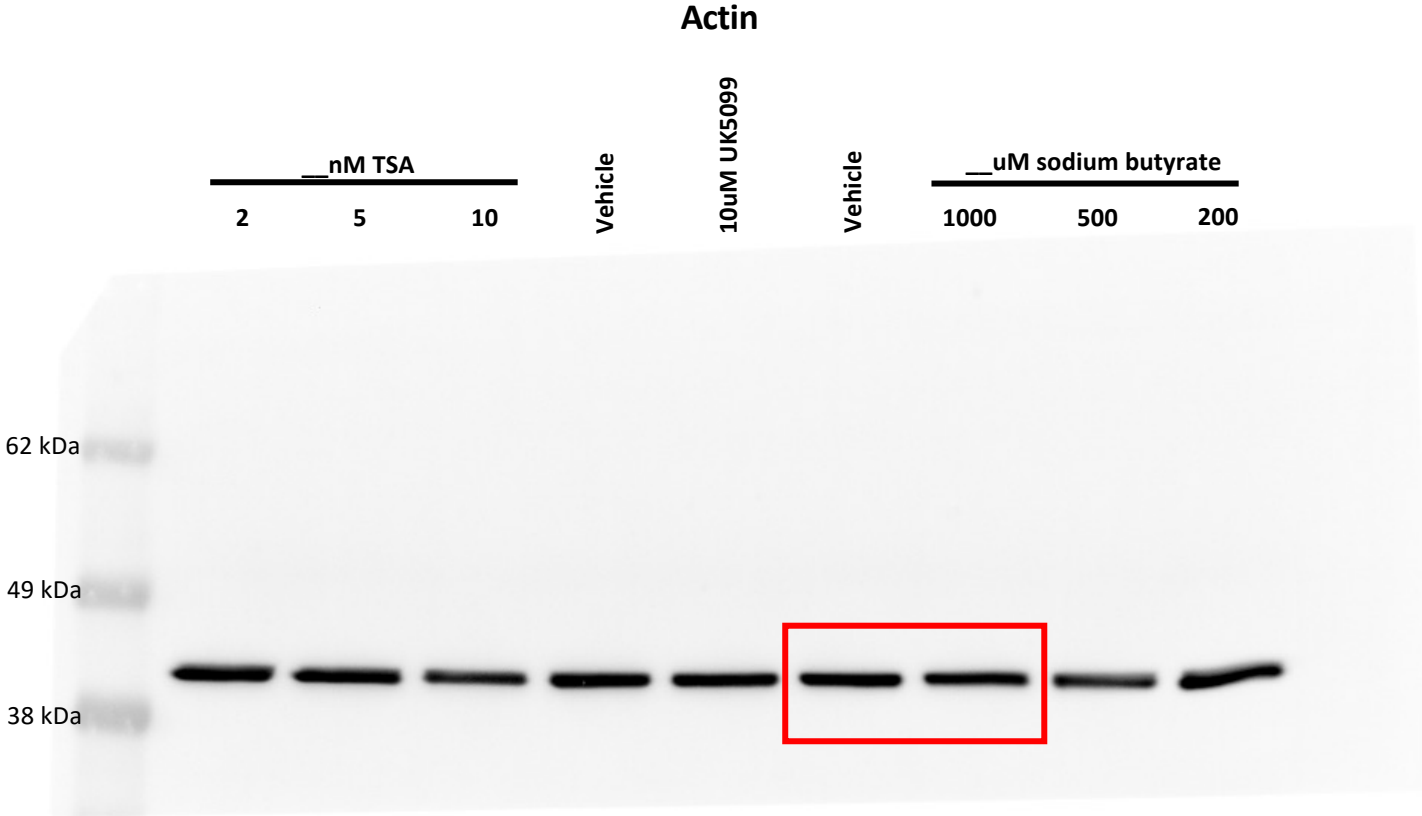

Extended Data Figure 1f

KRT5

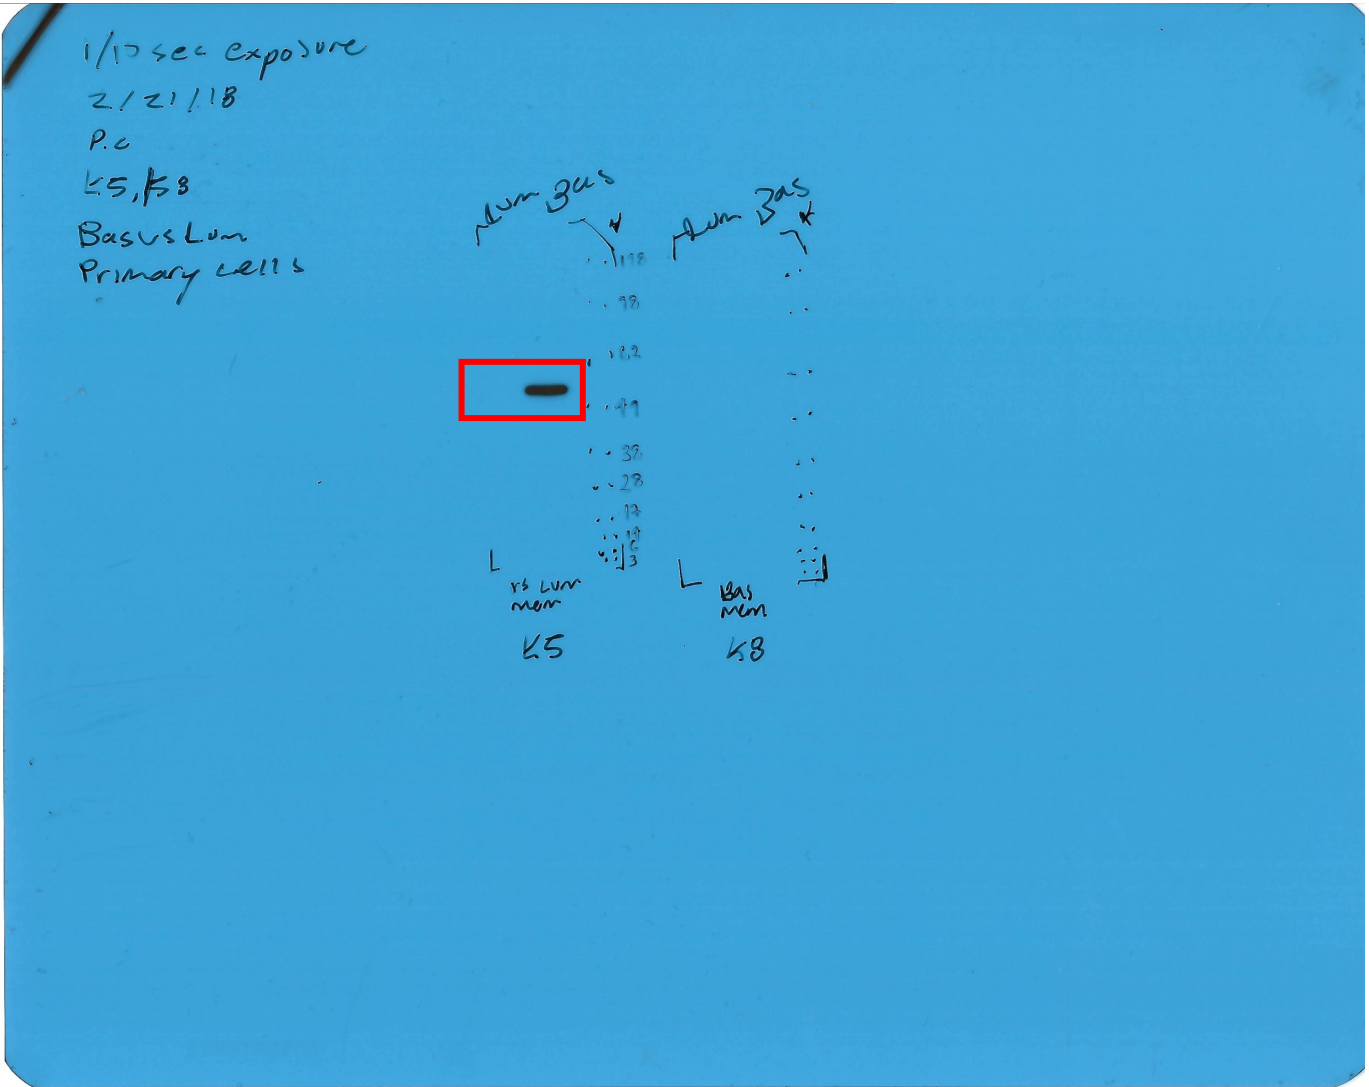



Extended Data Figure 1f

PBSN

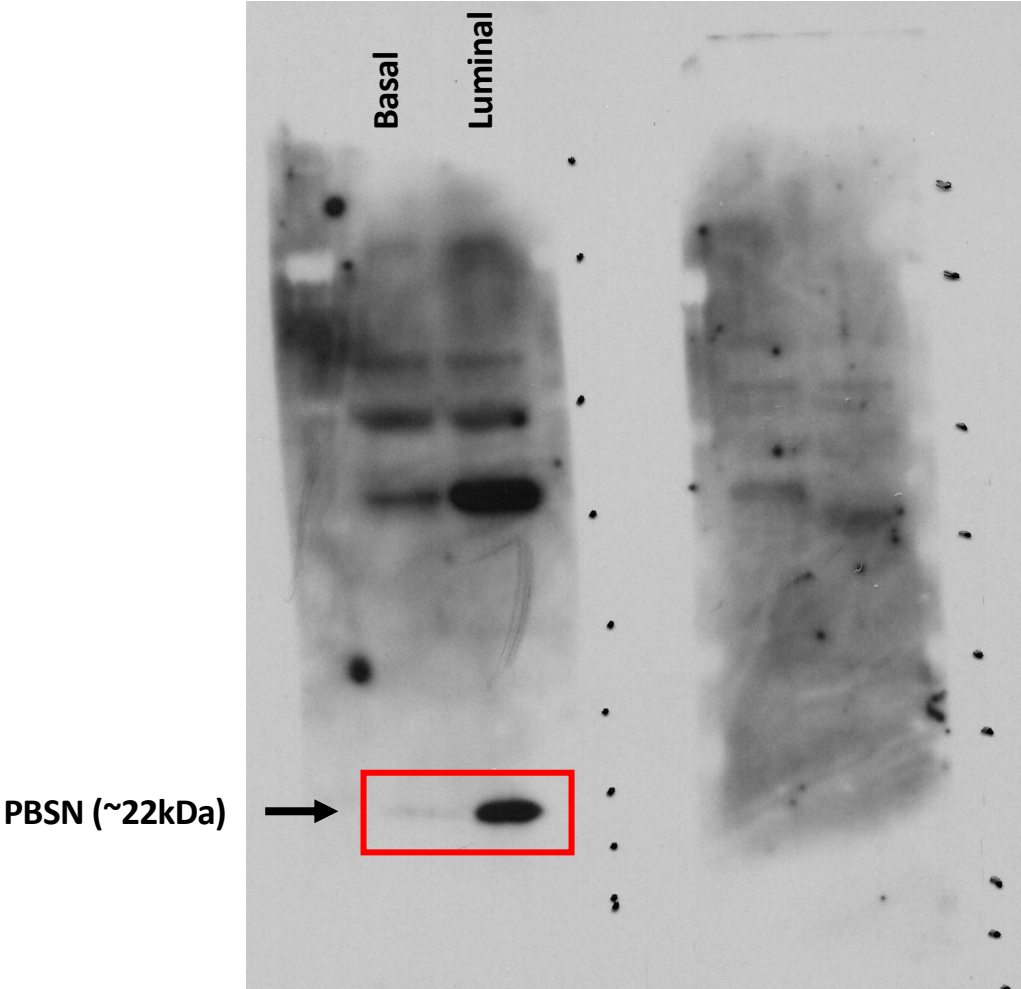

Slot-blot – SYPRO Ruby

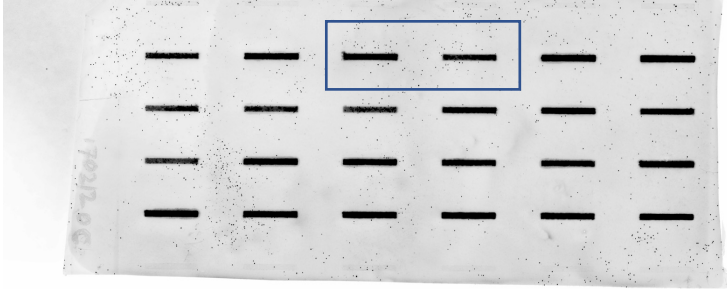

GLUT1

BL6, Sem. Ves., Basal  
BL6, Sem. Ves., Luminal  
BL6, Prostate, Basal  
BL6, Prostate, Luminal  
CD38KO, Prostate, Basal  
CD38KO, Prostate, Luminal

GLUT1 (~40-60kDa) →  
62  
49  
38

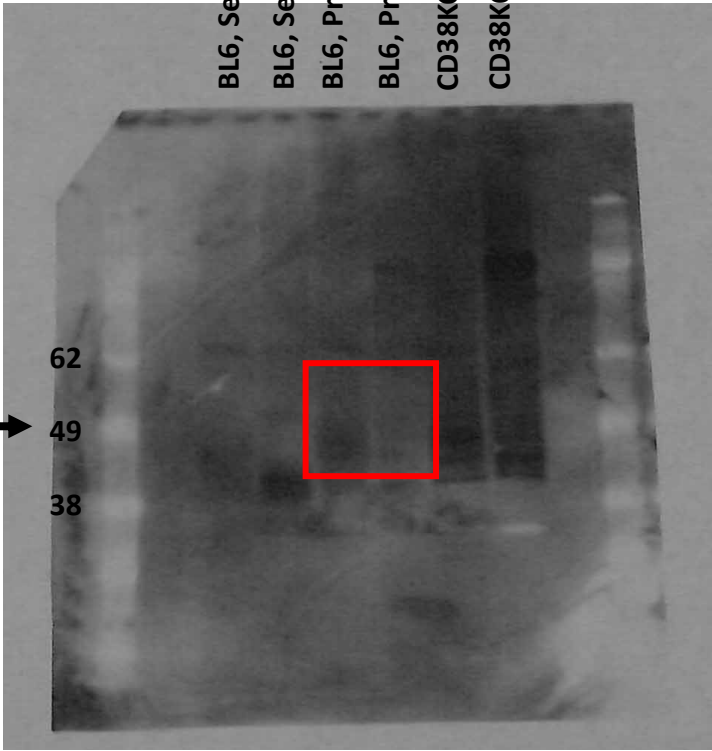

Slot-blot – SYPRO Ruby

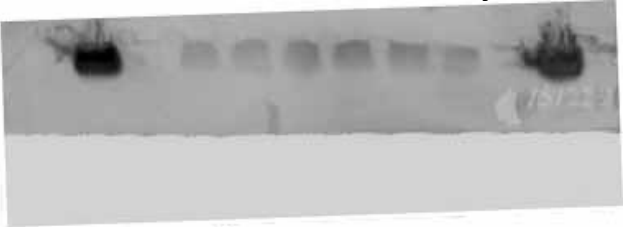

GLUT3

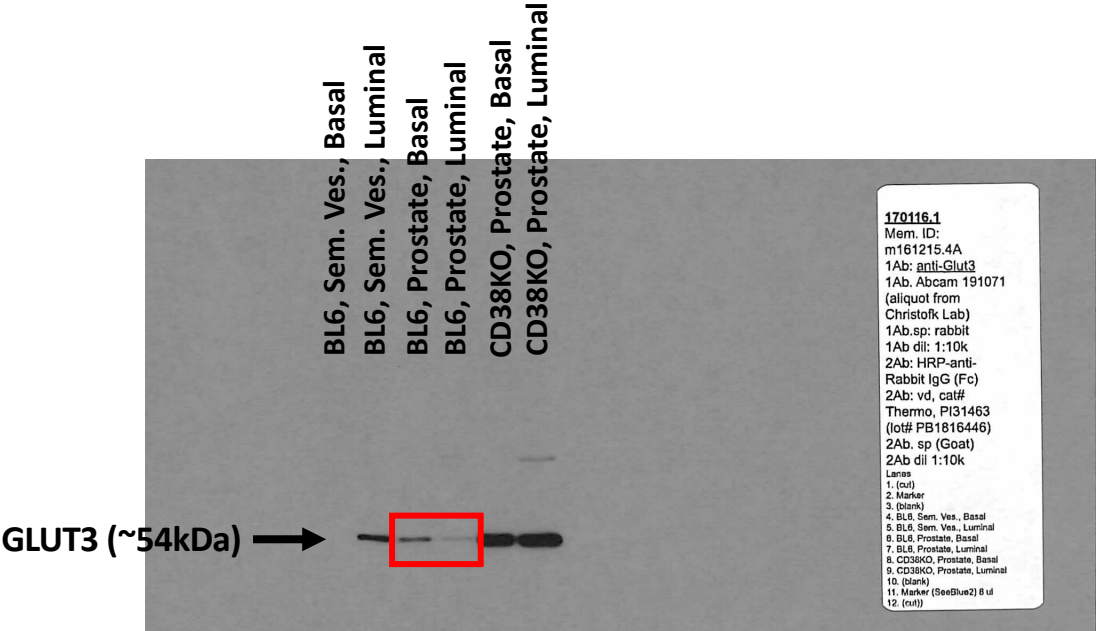

Slot-blot – SYPRO Ruby

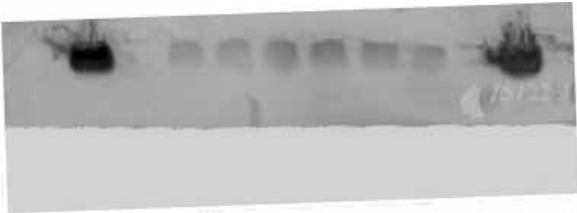

Extended Data Figure 1f

HK2

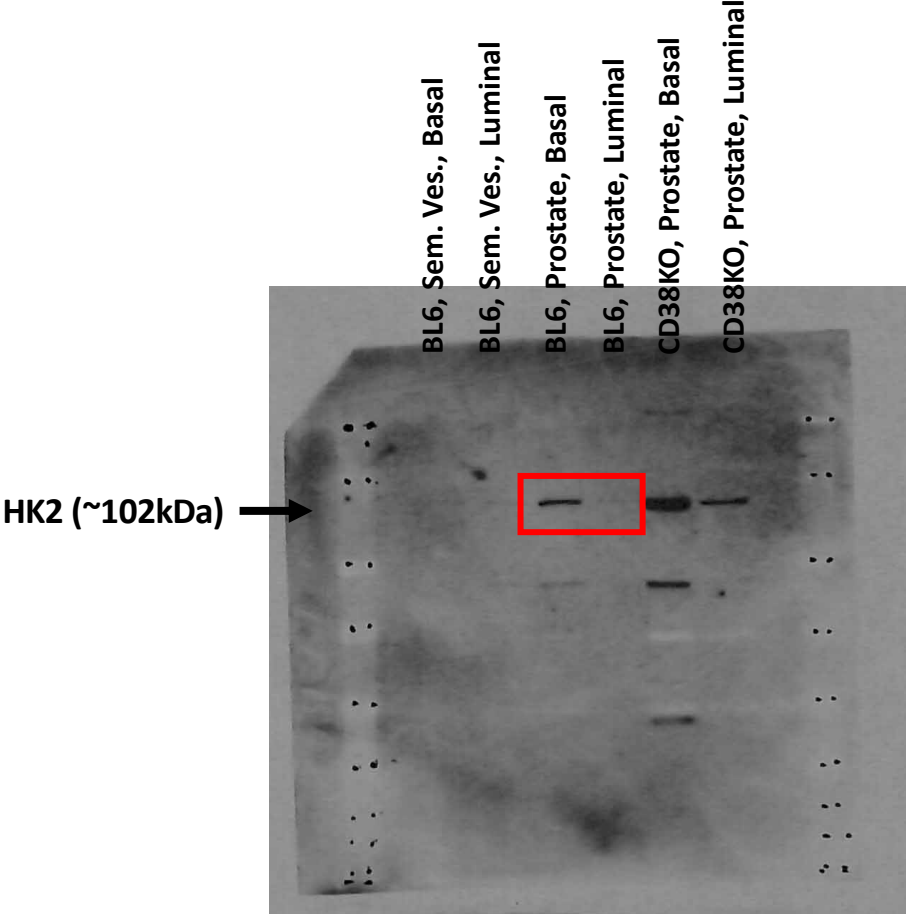

Slot-blot – SYPRO Ruby

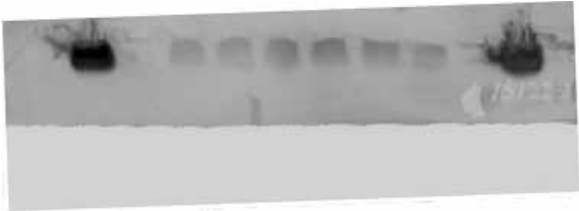

Extended Data Figure 1f

**PFKP**

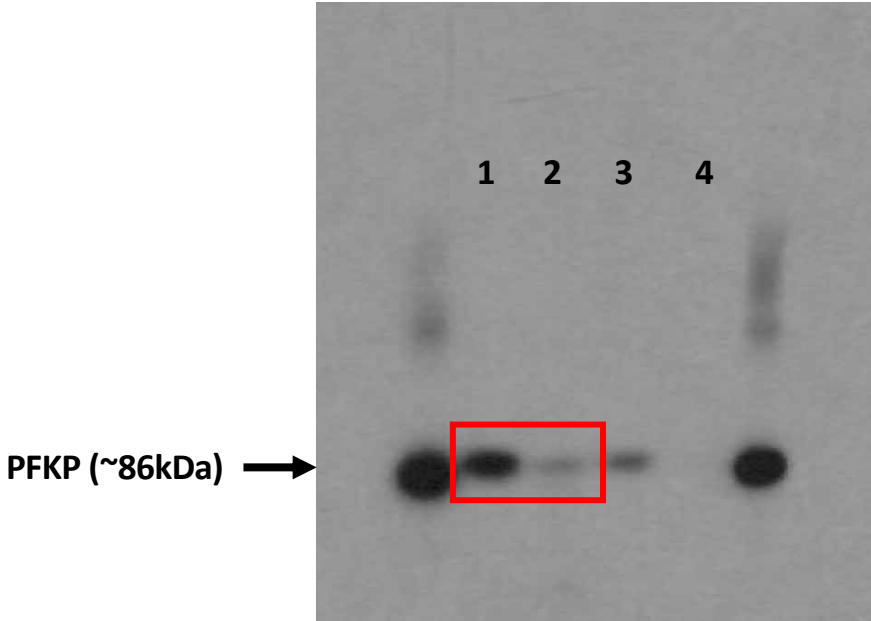

- 1. 12/5/16-3: WT(BL6) Prostate Basal 2.5 ug
- 2. 12/5/16-4: WT(BL6) Prostate Luminal 2.5 ug
- 3. 1/18/17-3: WT(BL6) Prostate Basal 2.5 ug
- 4. 1/18/17-4: WT(BL6) Prostate Luminal 2.5 ug

**SYPRO Ruby**

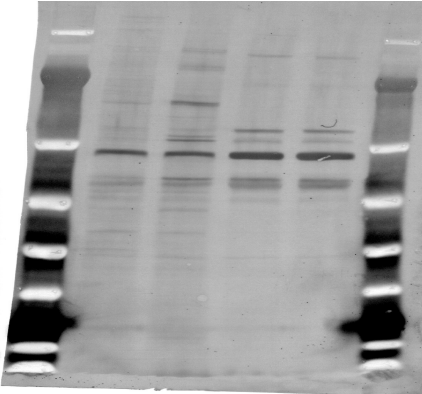

Extended Data Figure 1f

PCX

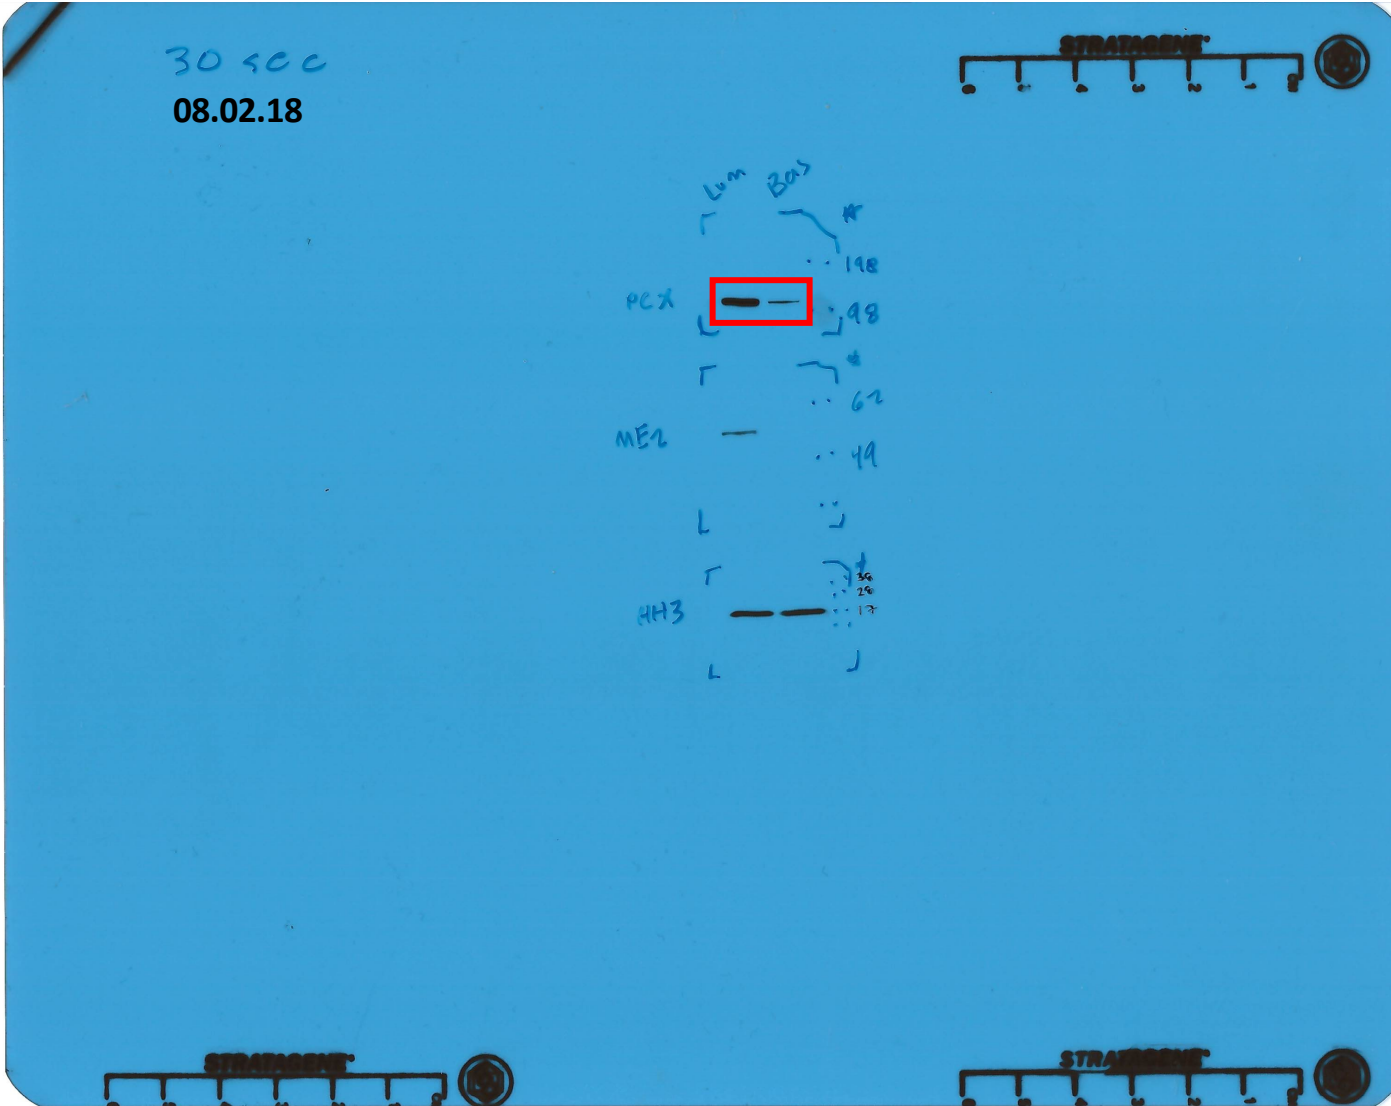



PDHA1

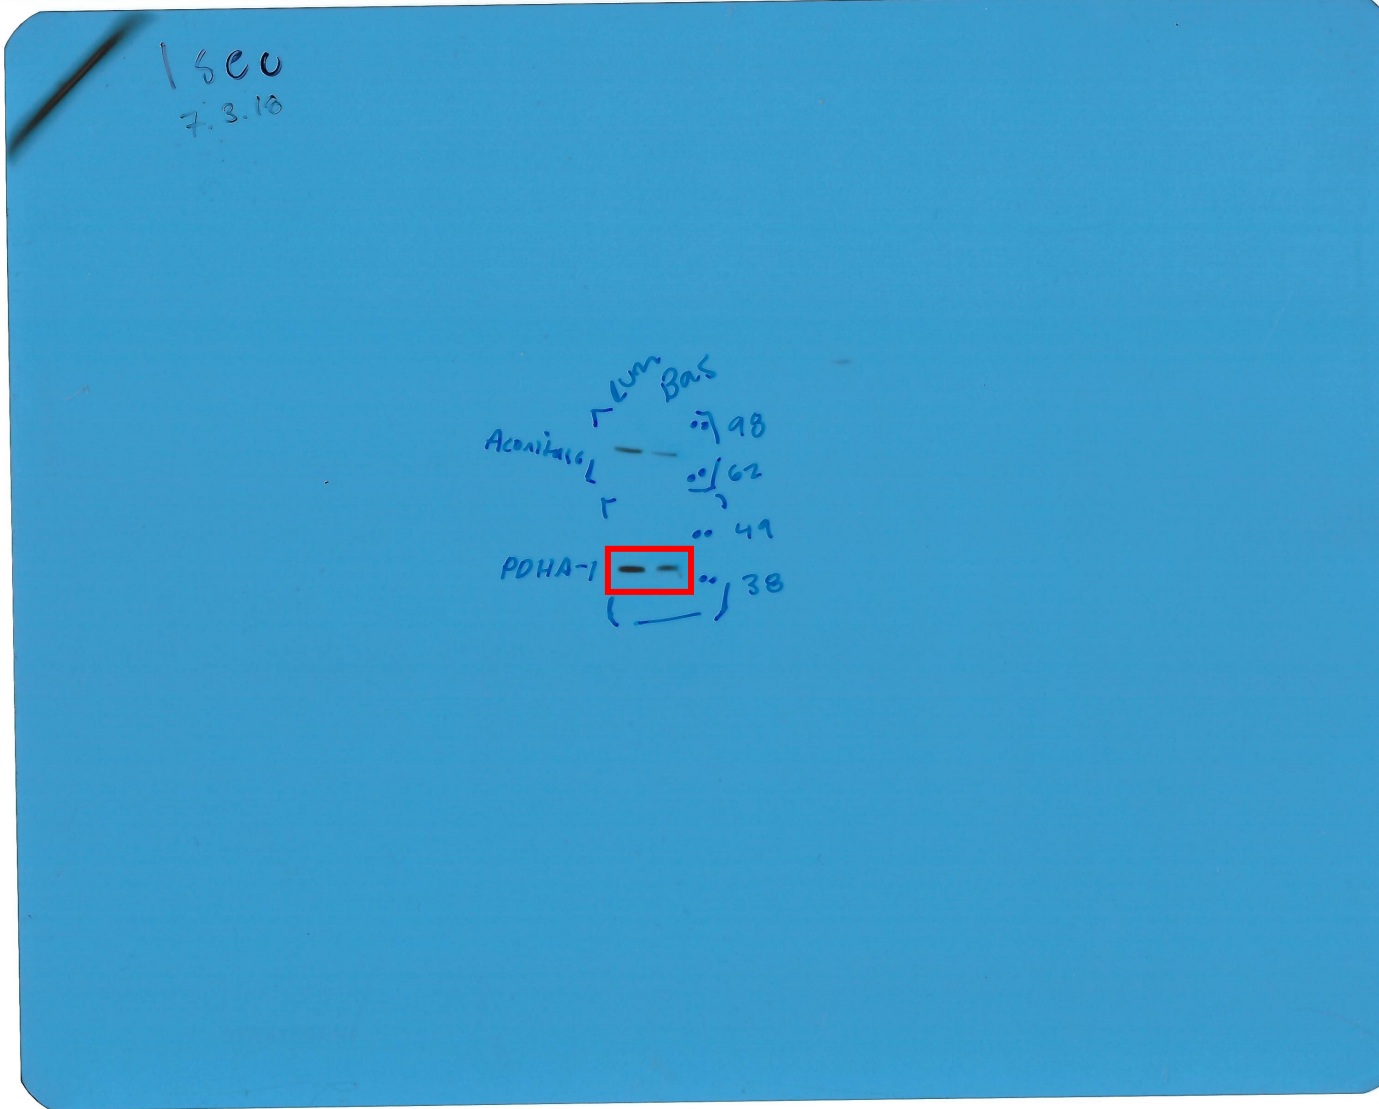

ACO2

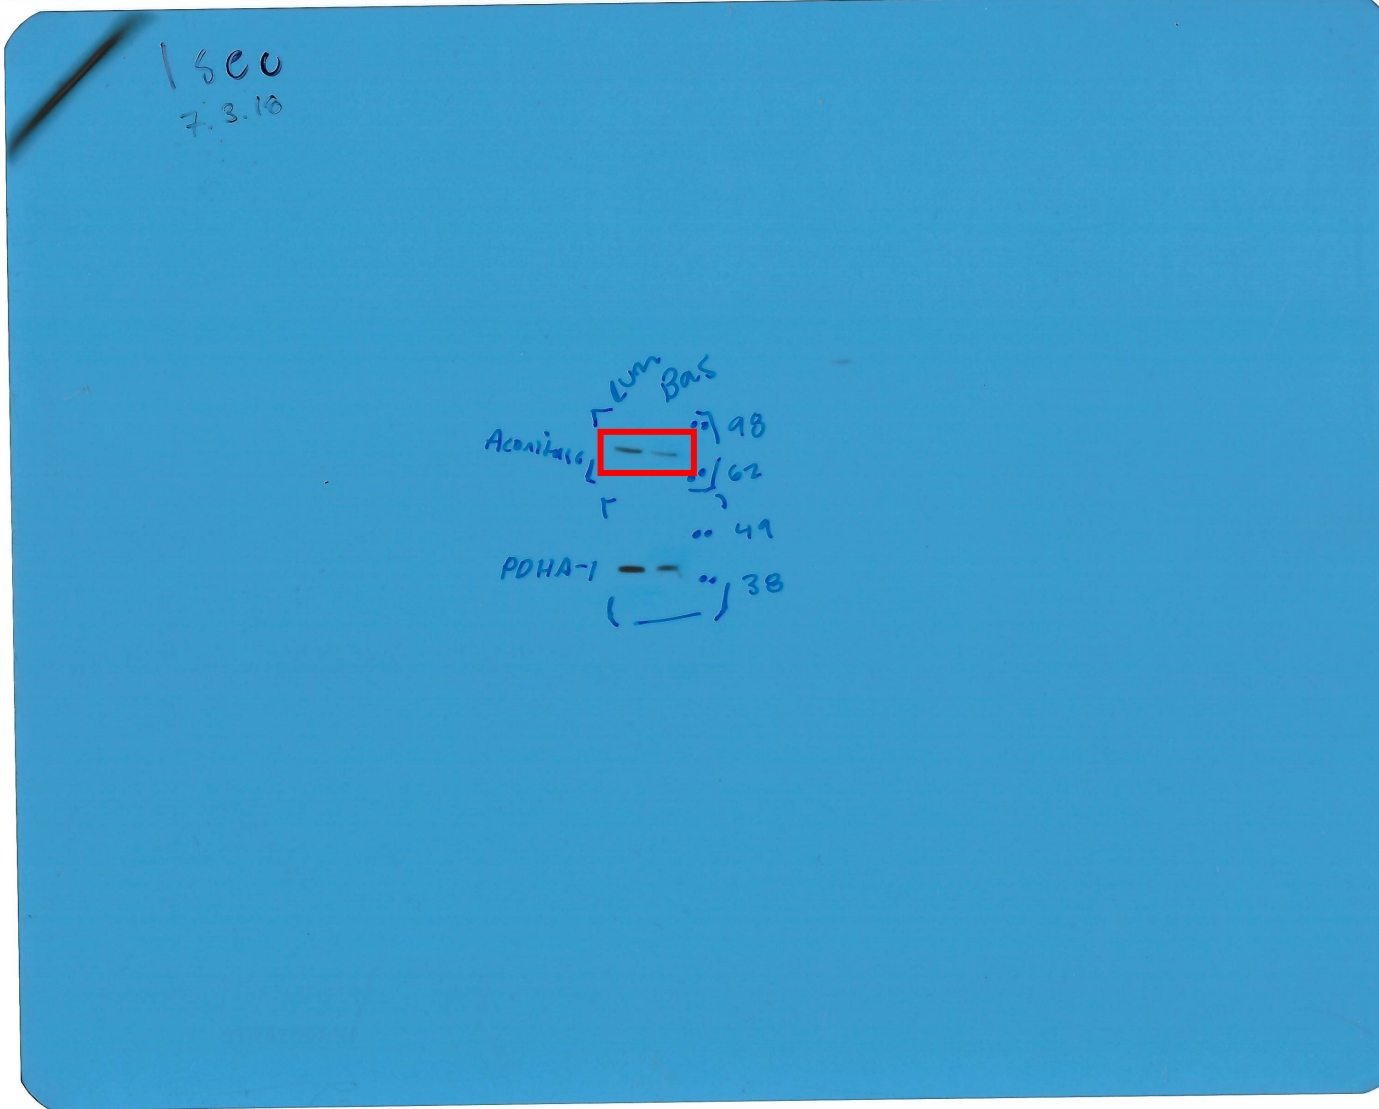

HH3

30 sec

08.02.18

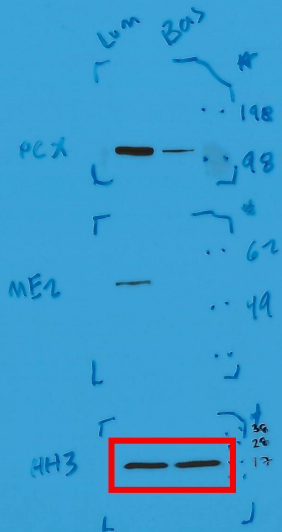

Extended Data Figure 3f

PCNA

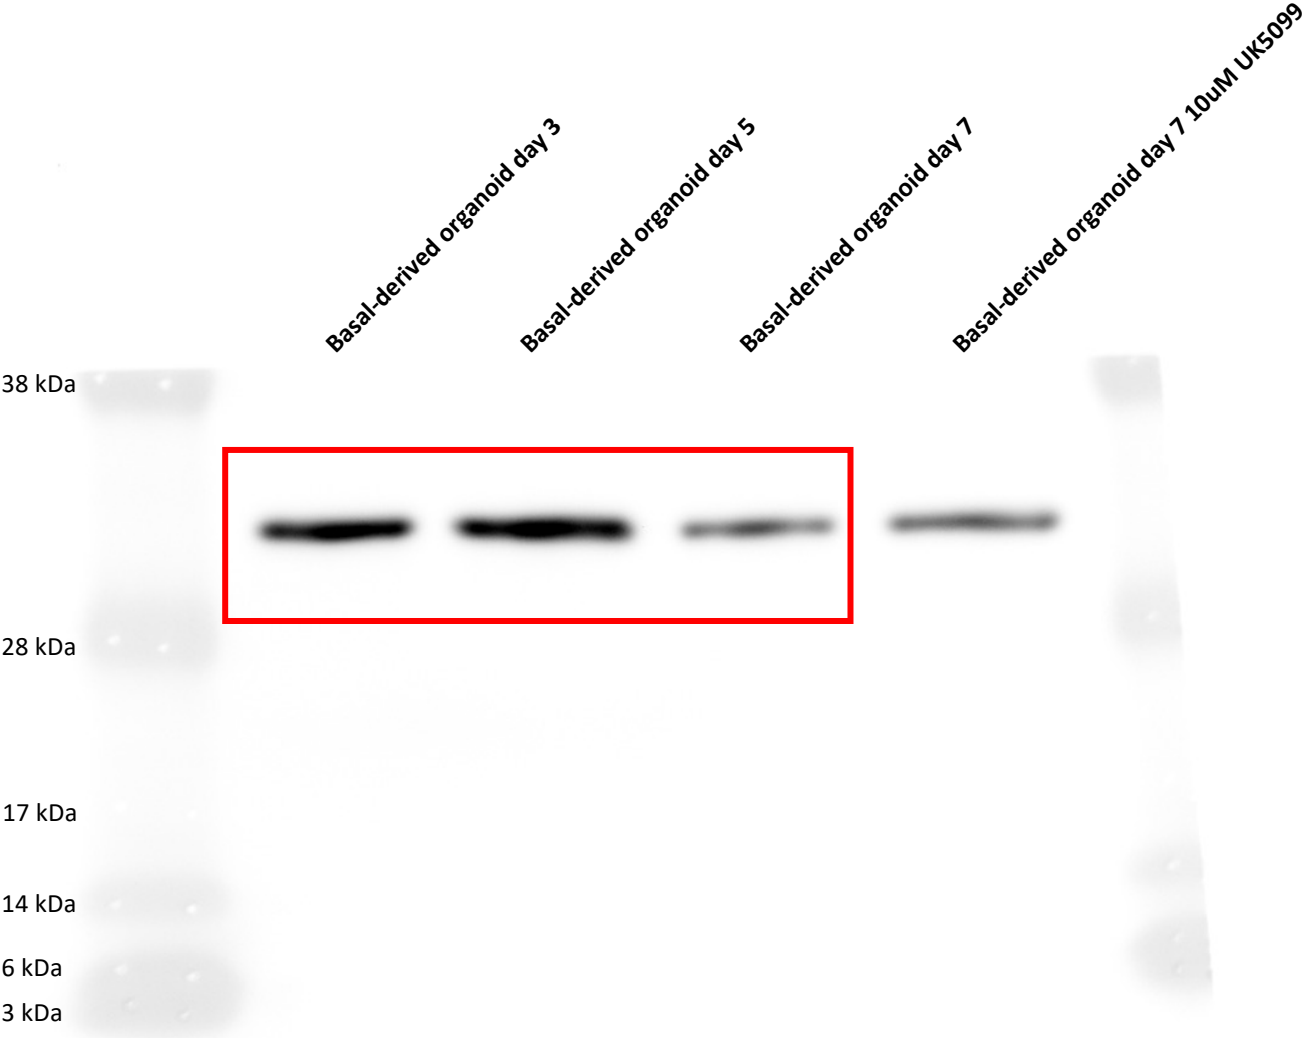

Extended Data Figure 3f

Actin

Basal-derived organoid day 3  
Basal-derived organoid day 5  
Basal-derived organoid day 7  
Basal-derived organoid day 7 10uM UK5099

49 kDa

38 kDa

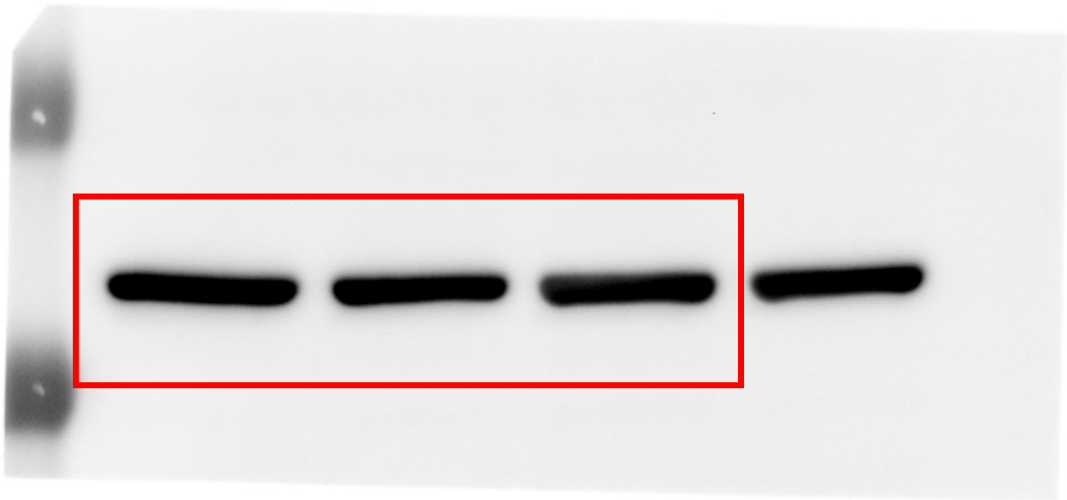

Ki67

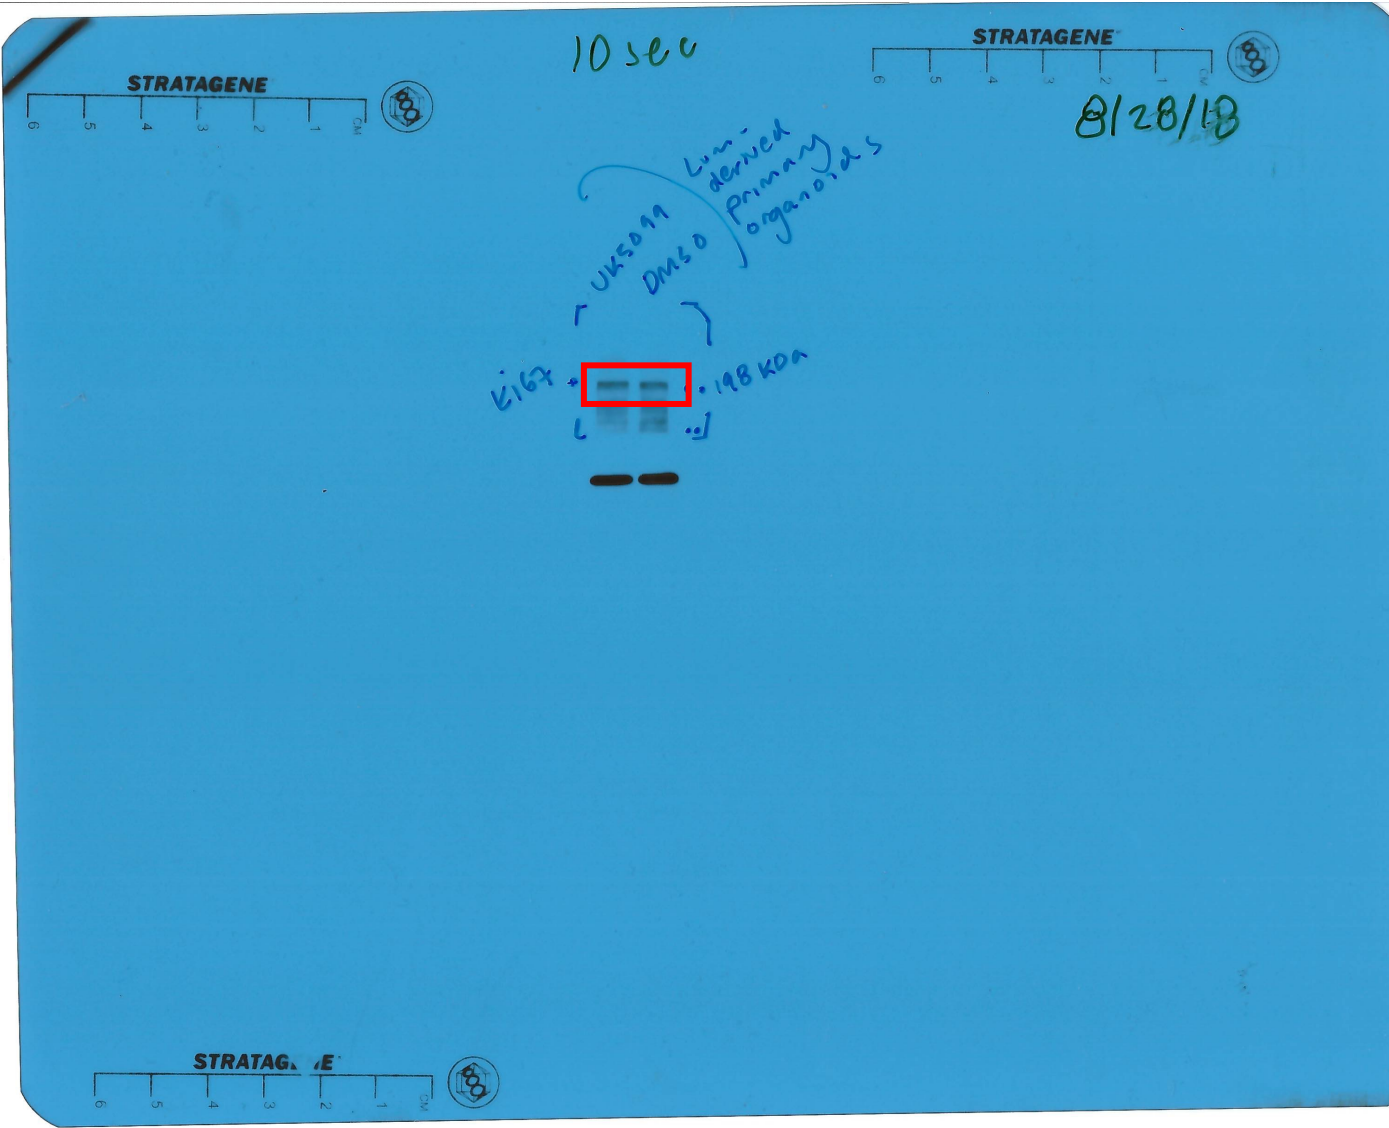



Extended Data Figure 4d

PCNA

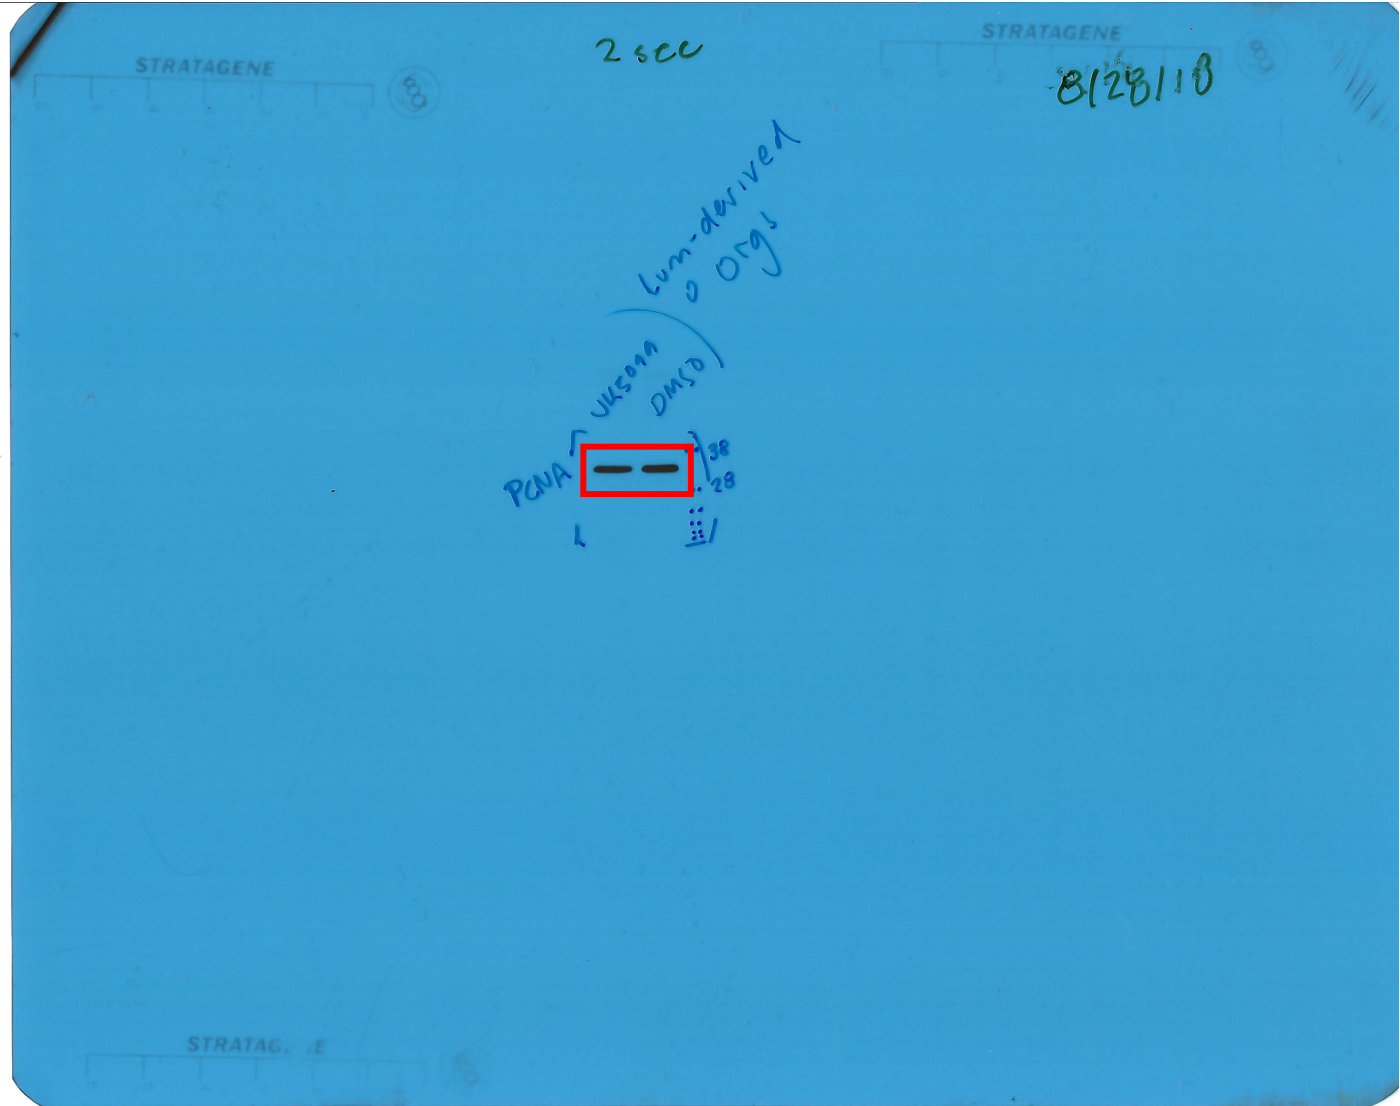

Cleaved caspase-3

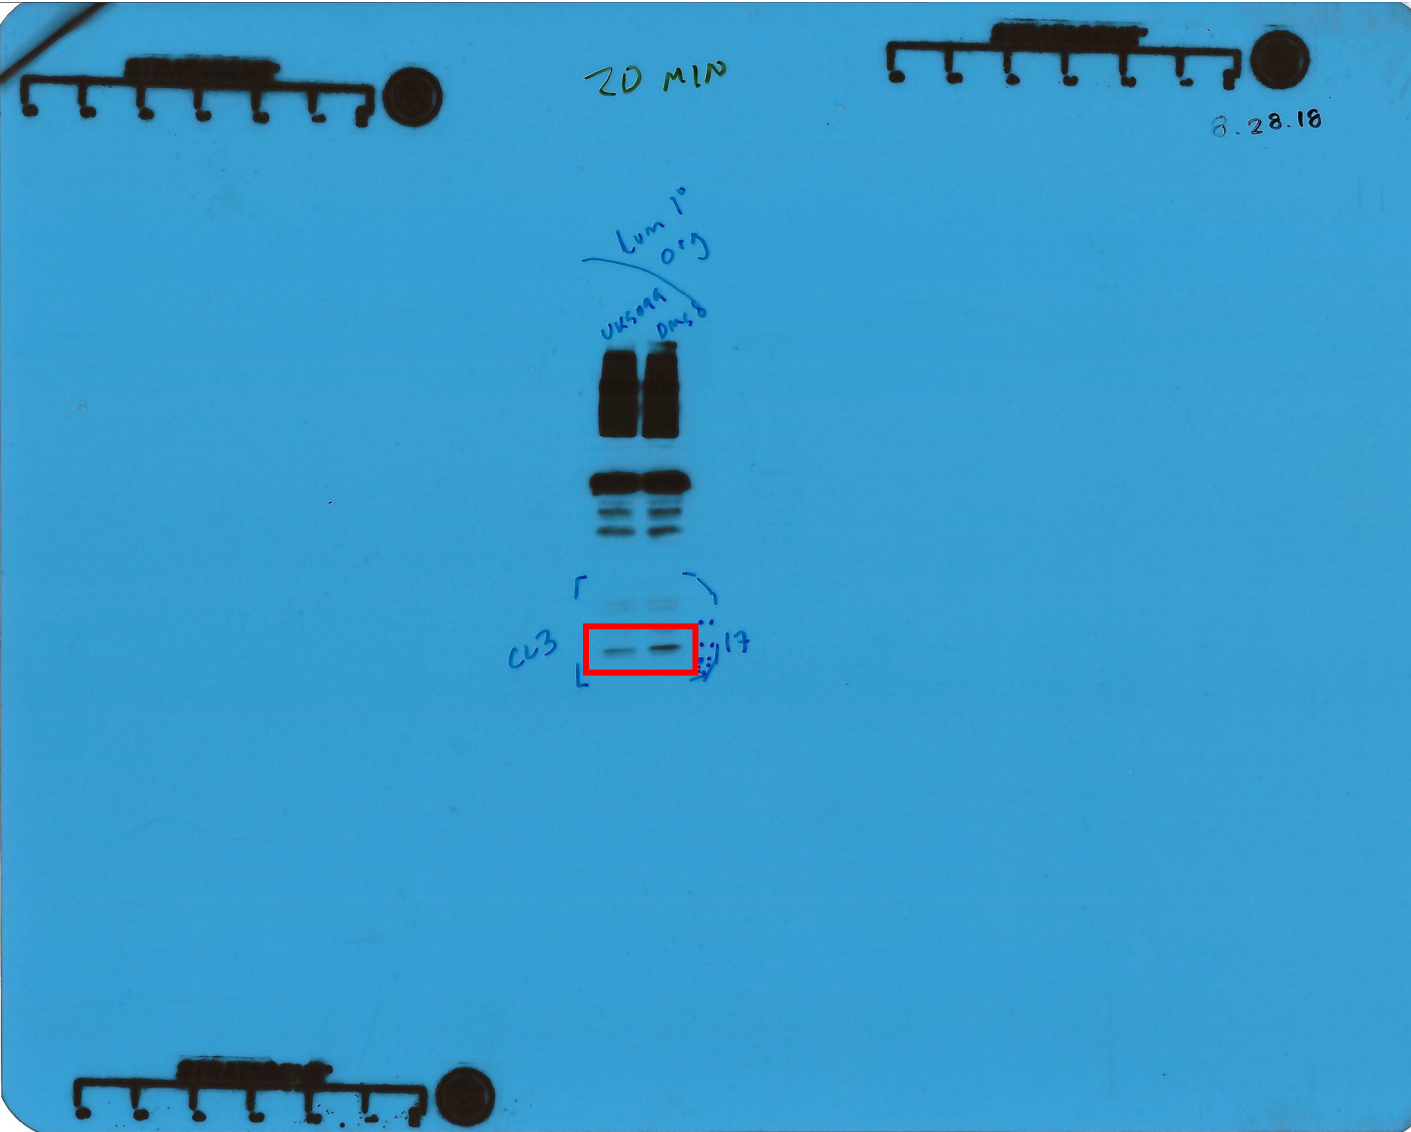

Extended Data Figure 4d

Actin

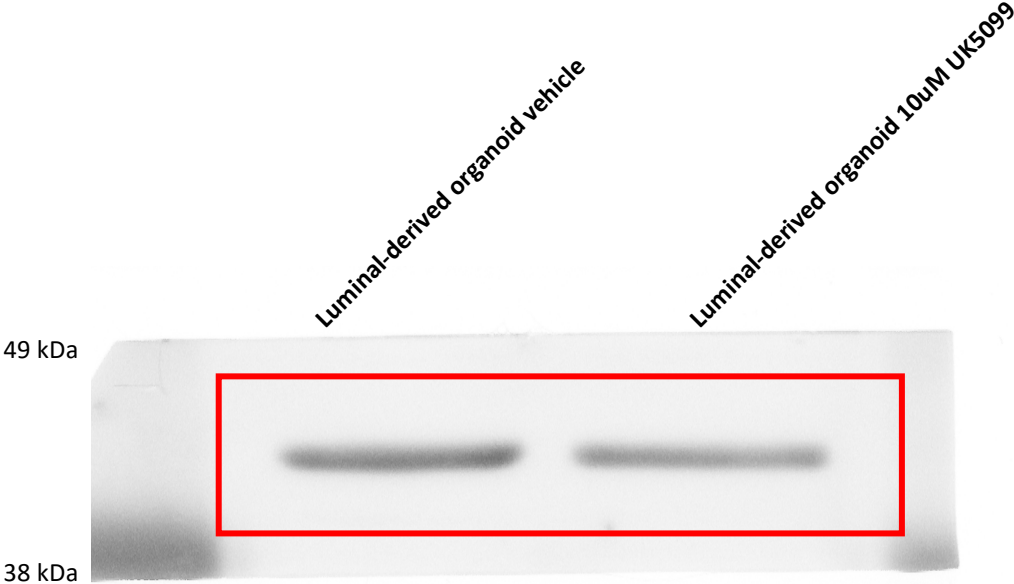

Extended Data Figure 6a

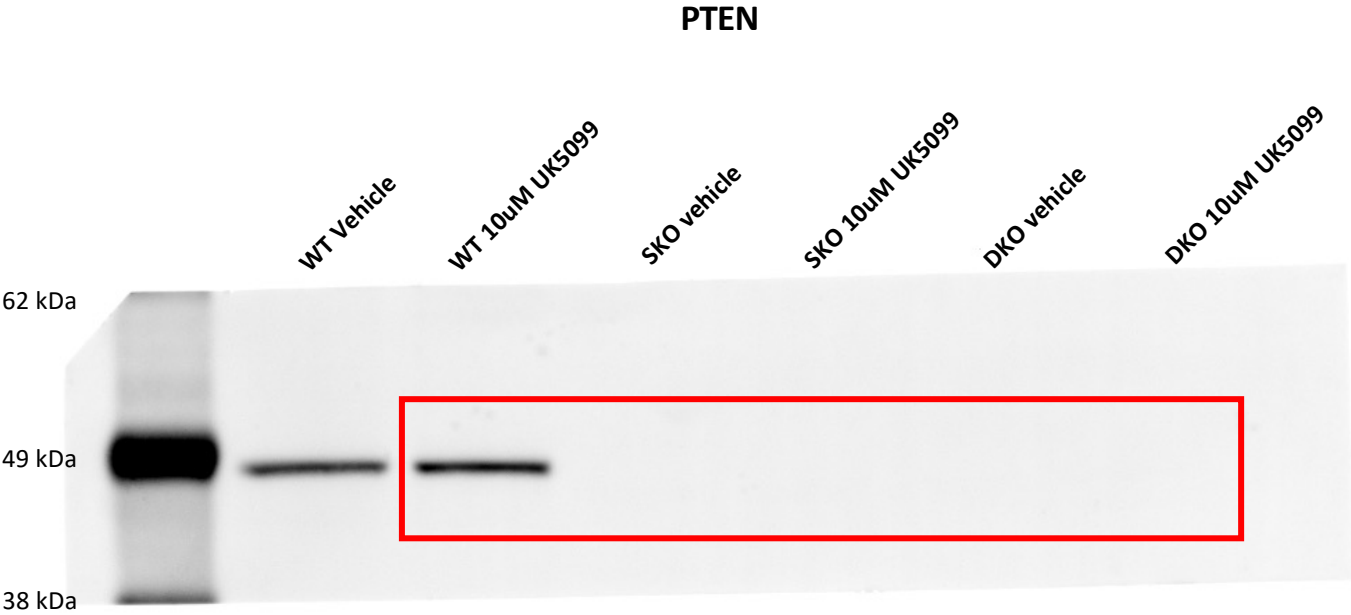

Extended Data Figure 6a

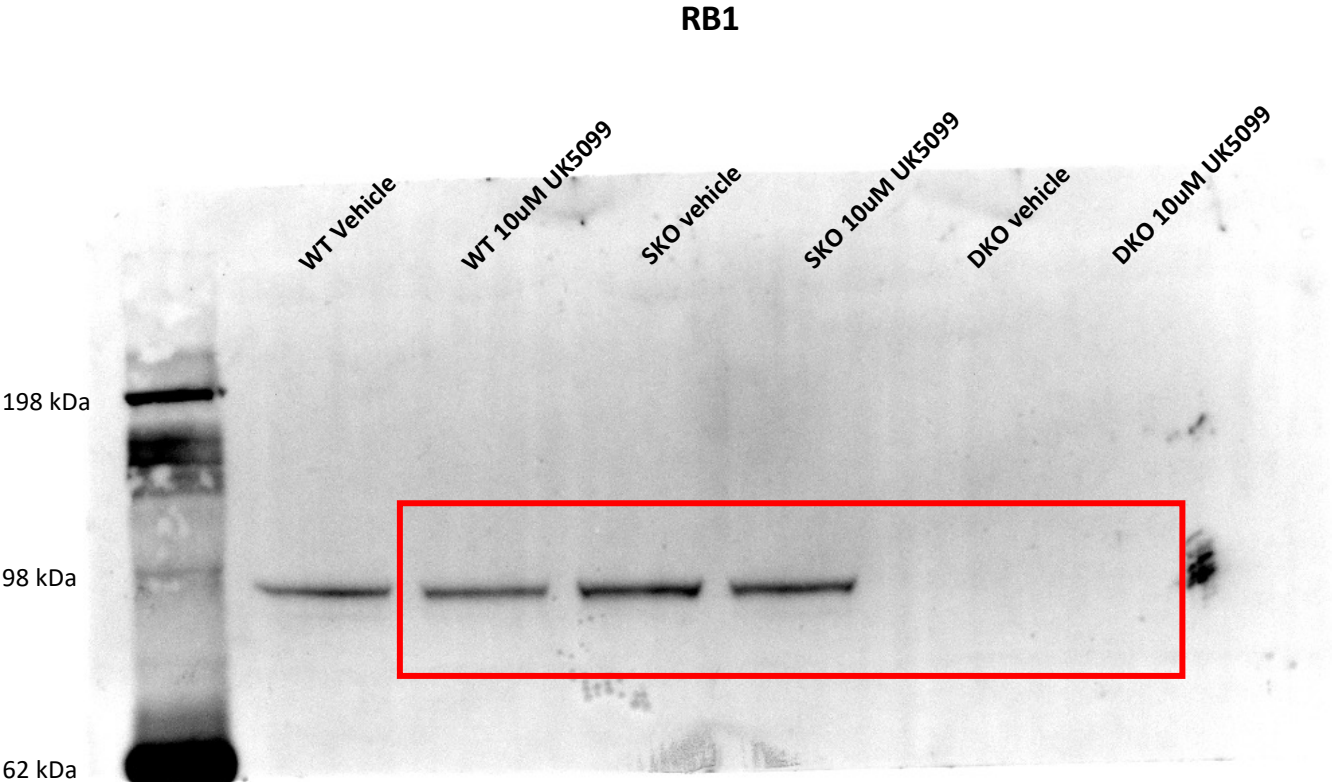



Extended Data Figure 6a

Vinculin

WT Vehicle      WT 10uM UK5099      SKO vehicle      SKO 10uM UK5099      DKO vehicle      DKO 10uM UK5099

198 kDa

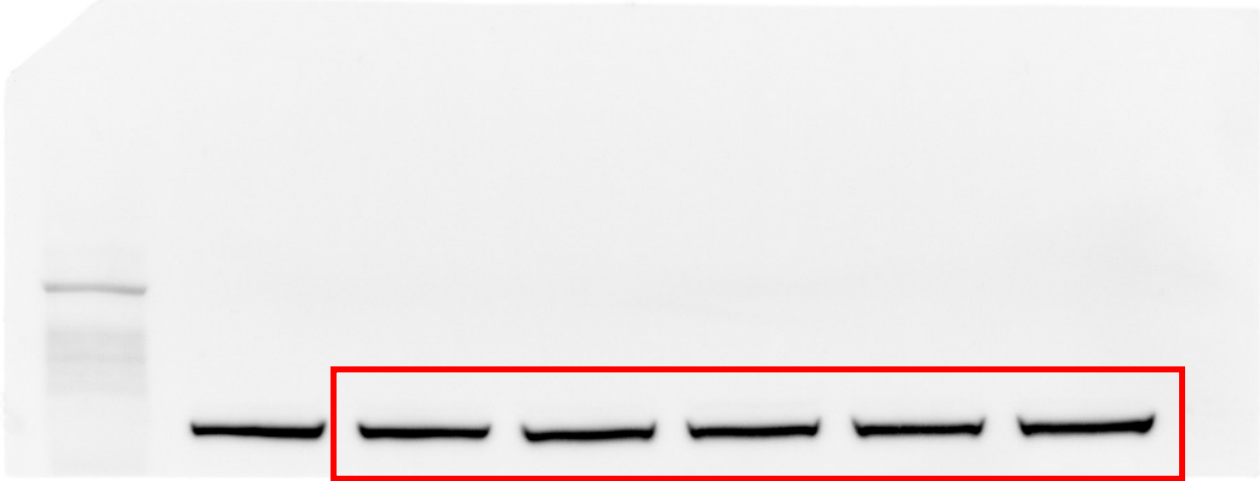

Extended Data Figure 6e

AR

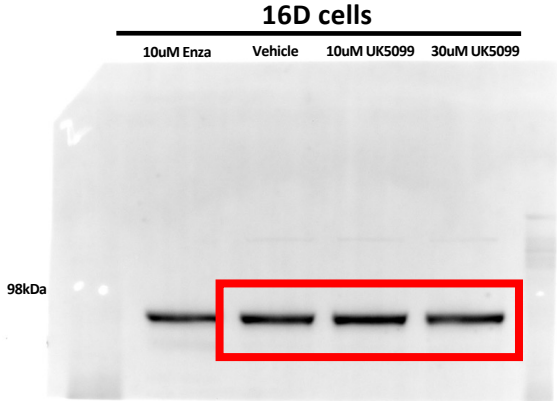

Extended Data Figure 6e

PSA

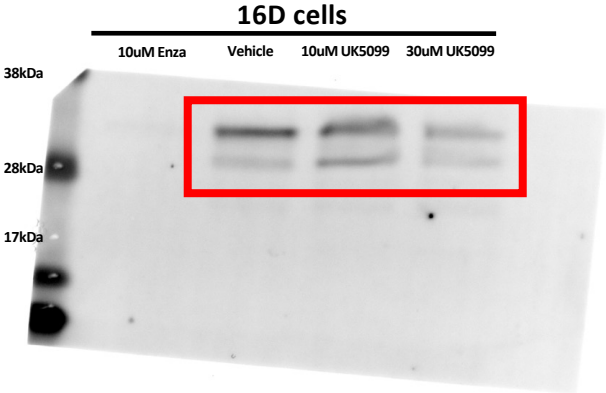

Extended Data Figure 6e

K8

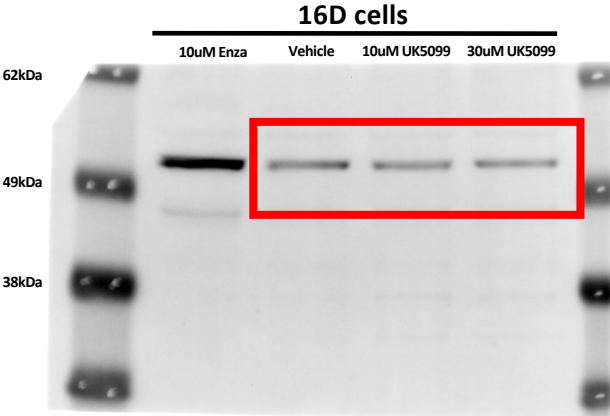

Extended Data Figure 6e

K18

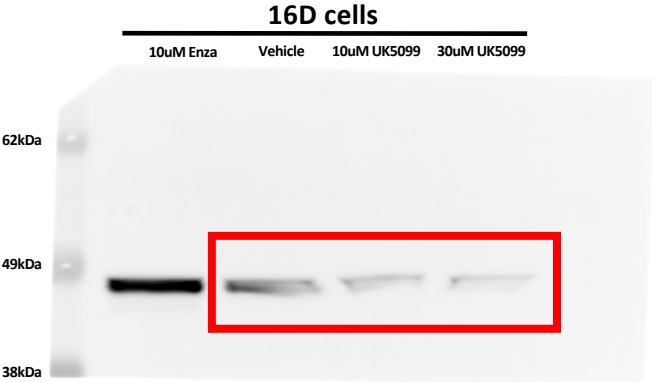



Extended Data Figure 6e

NSE

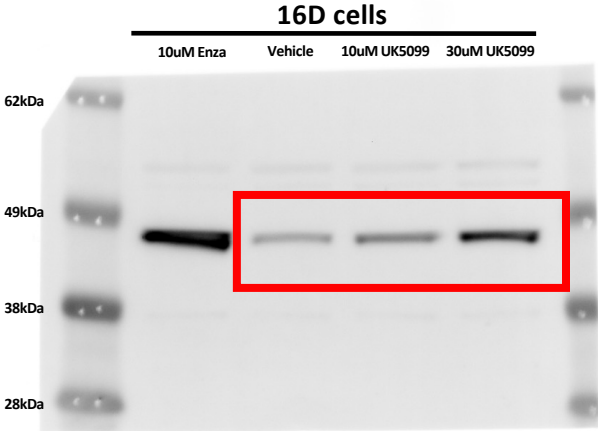

Extended Data Figure 6e

SYP

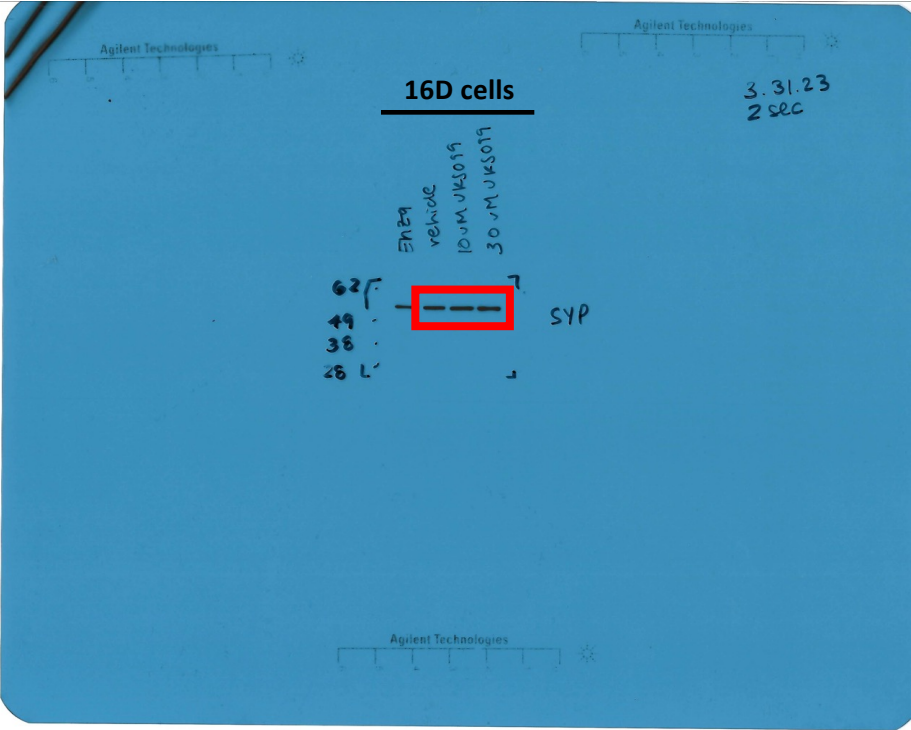

Extended Data Figure 6e

SOX2

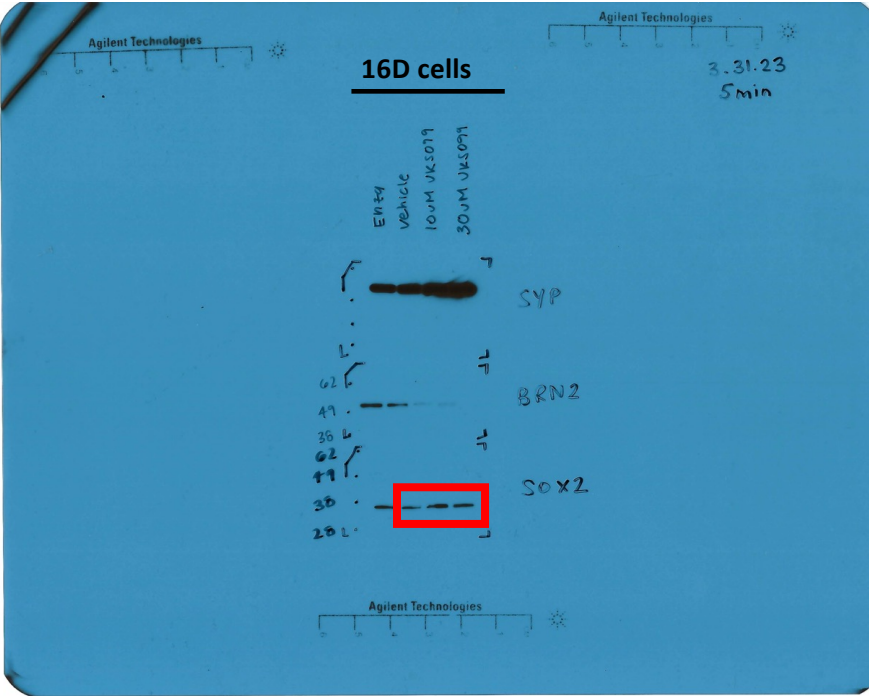

Extended Data Figure 6e

Actin

16D cells

10uM Enza    Vehicle    10uM UK5099    30uM UK5099

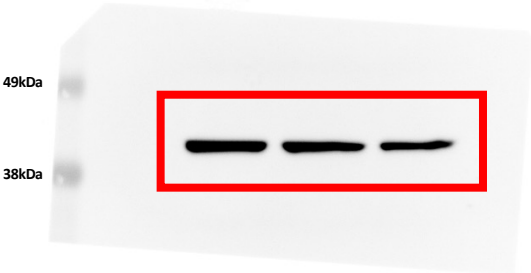

AR

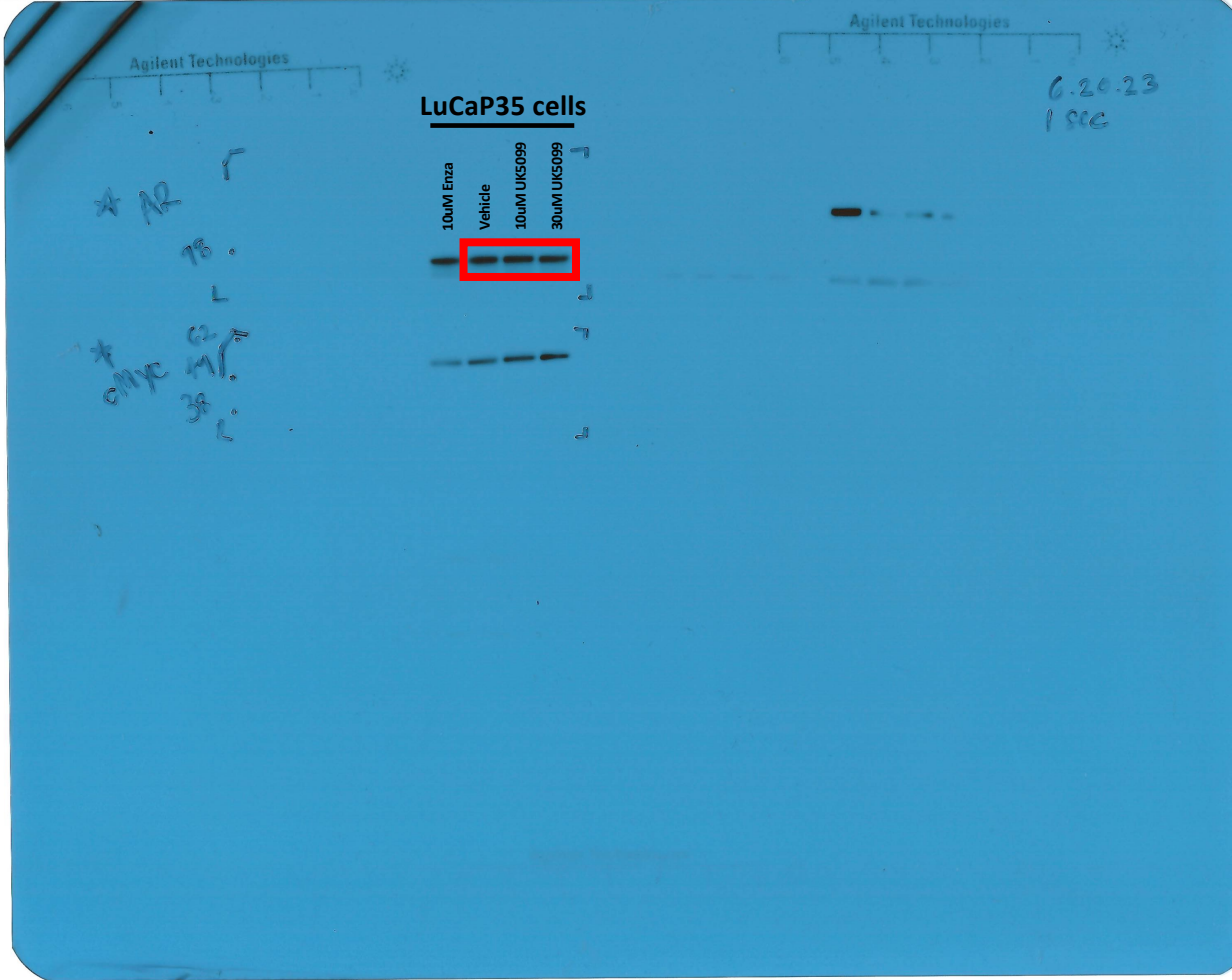

Extended Data Figure 6f

KRT8

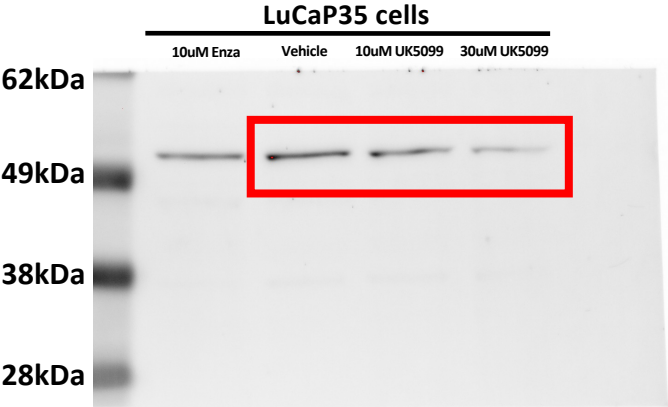



SOX2

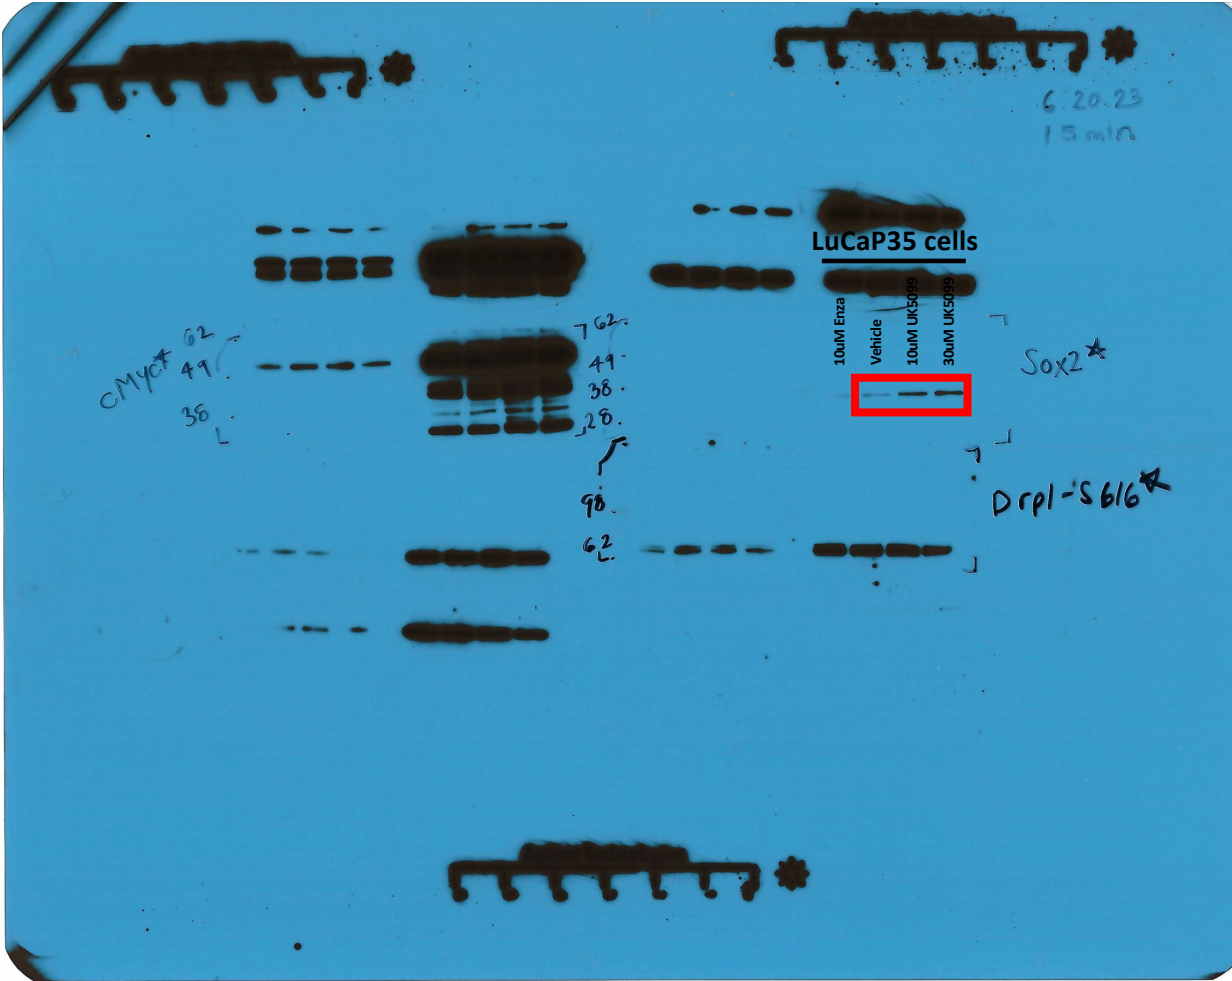

Extended Data Figure 6f

NSE

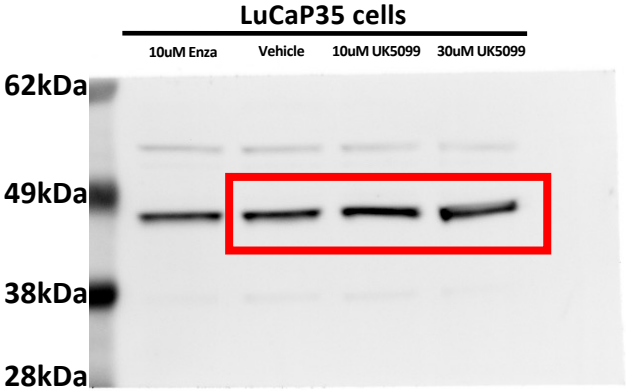

Extended Data Figure 6f

ACTIN

LuCaP35 cells

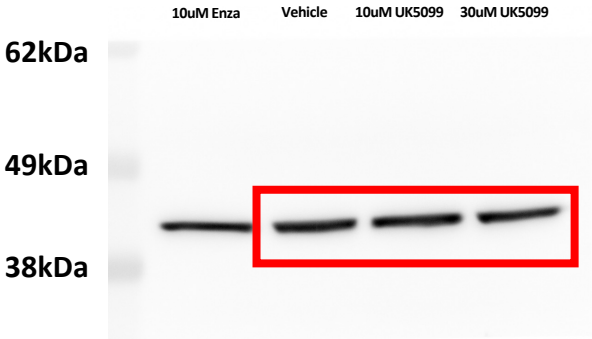

Extended Data Figure 6g

AR

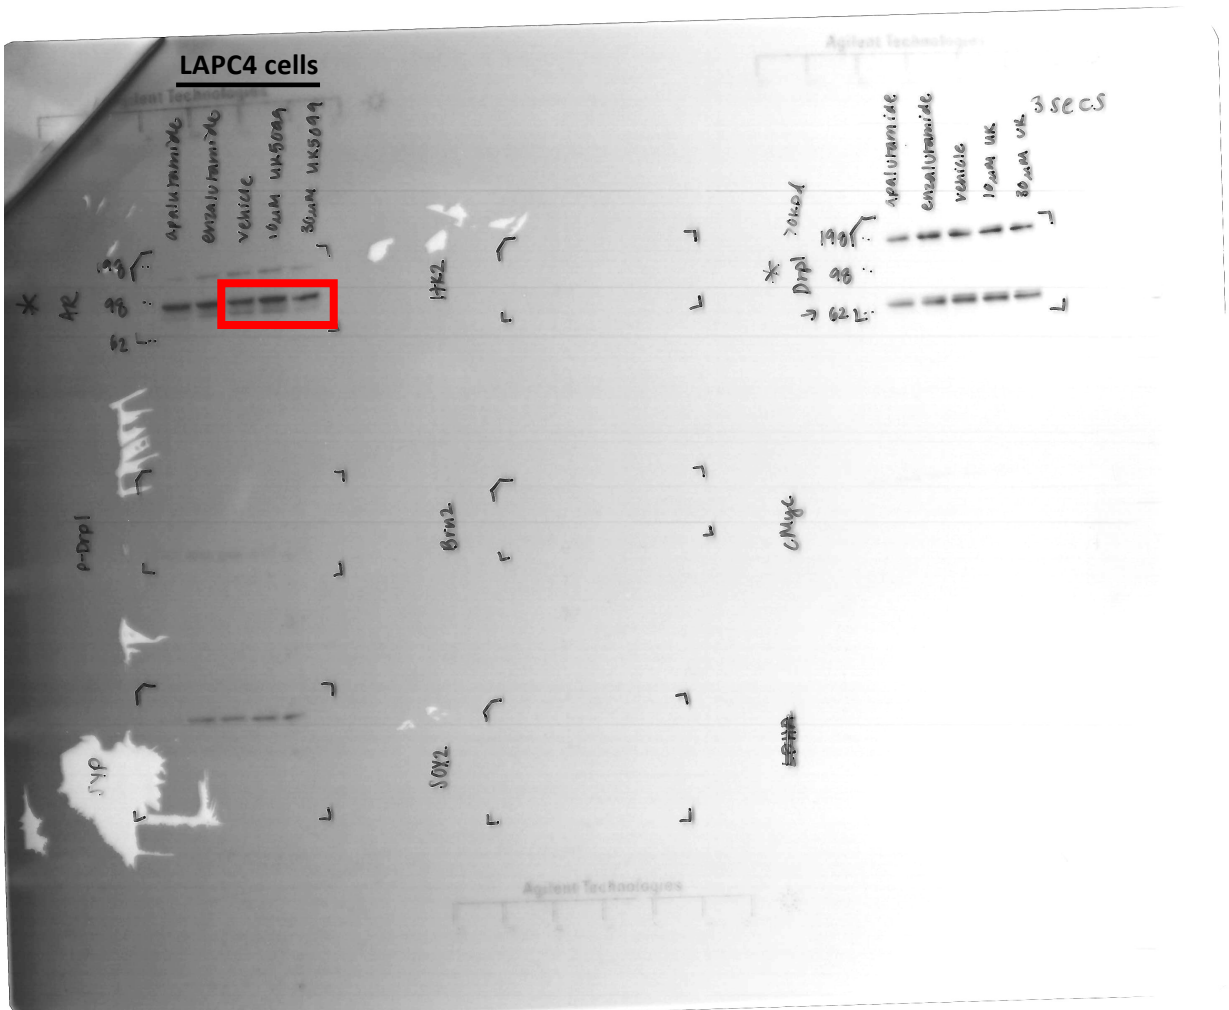

Extended Data Figure 6g

PSA

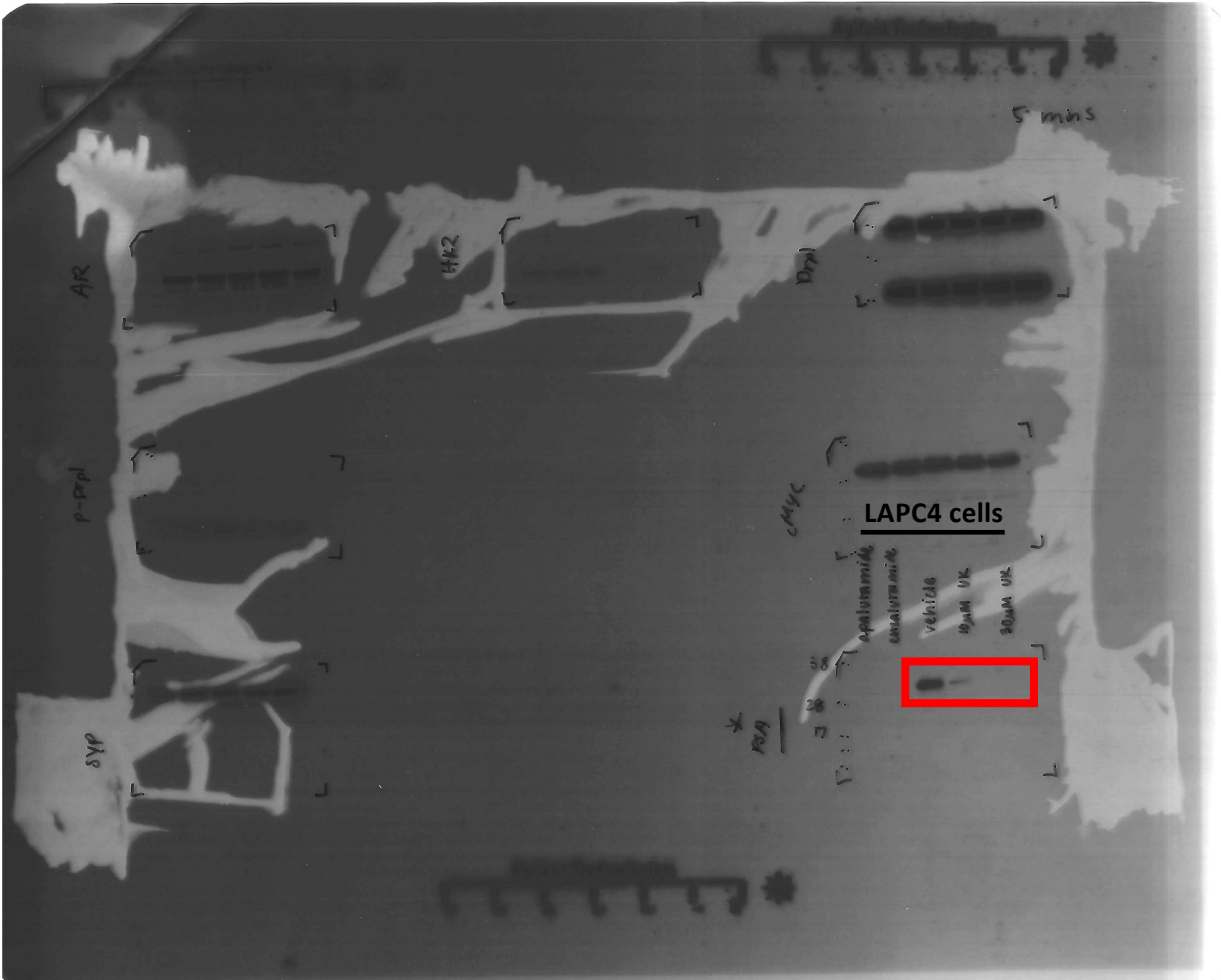

Extended Data Figure 6g

SYP

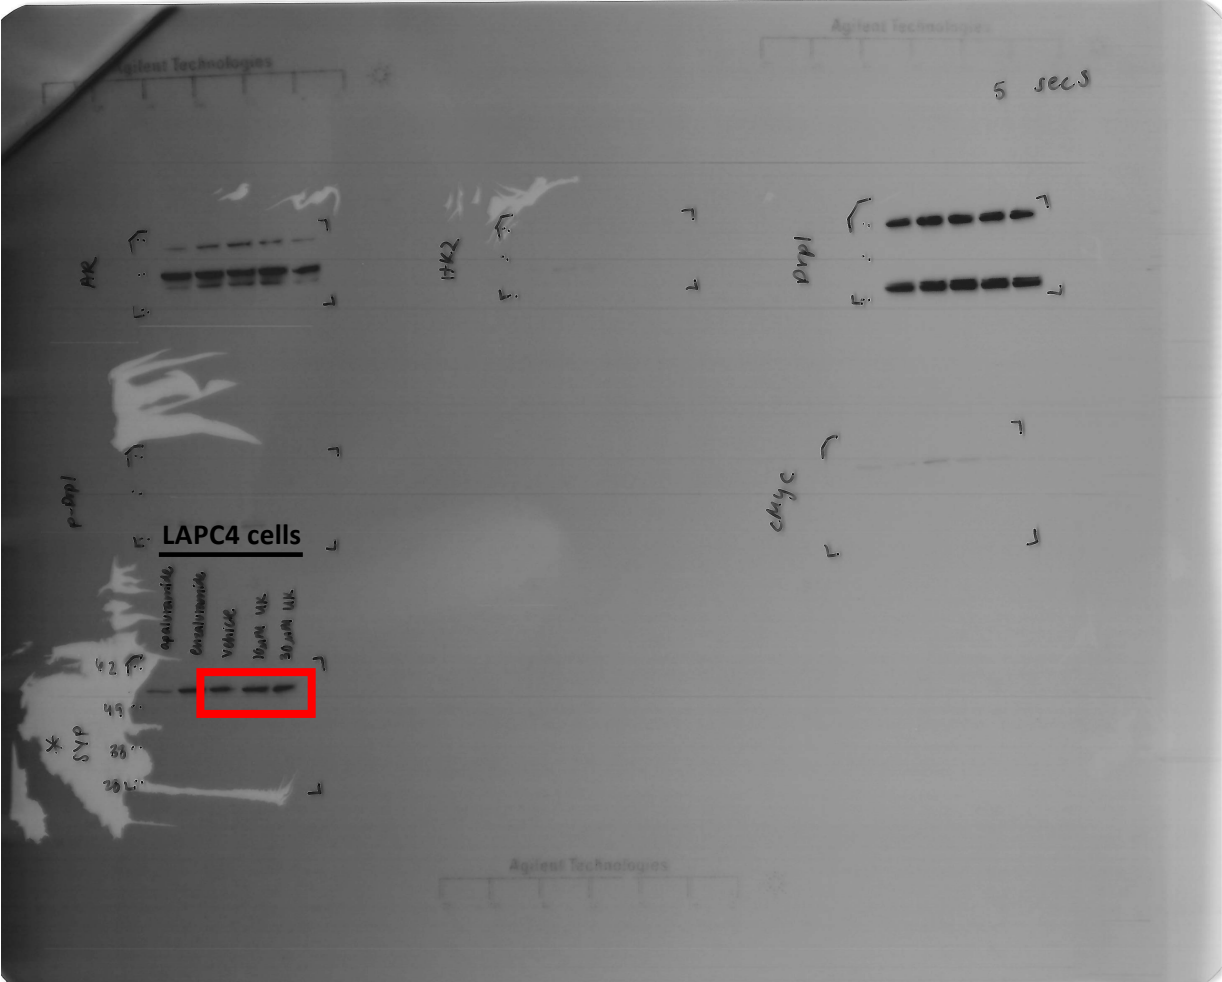



Extended Data Figure 6g

ACTIN

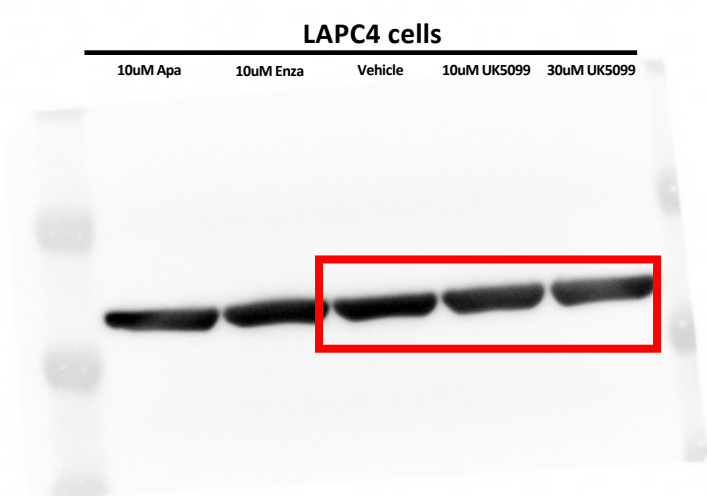

AR

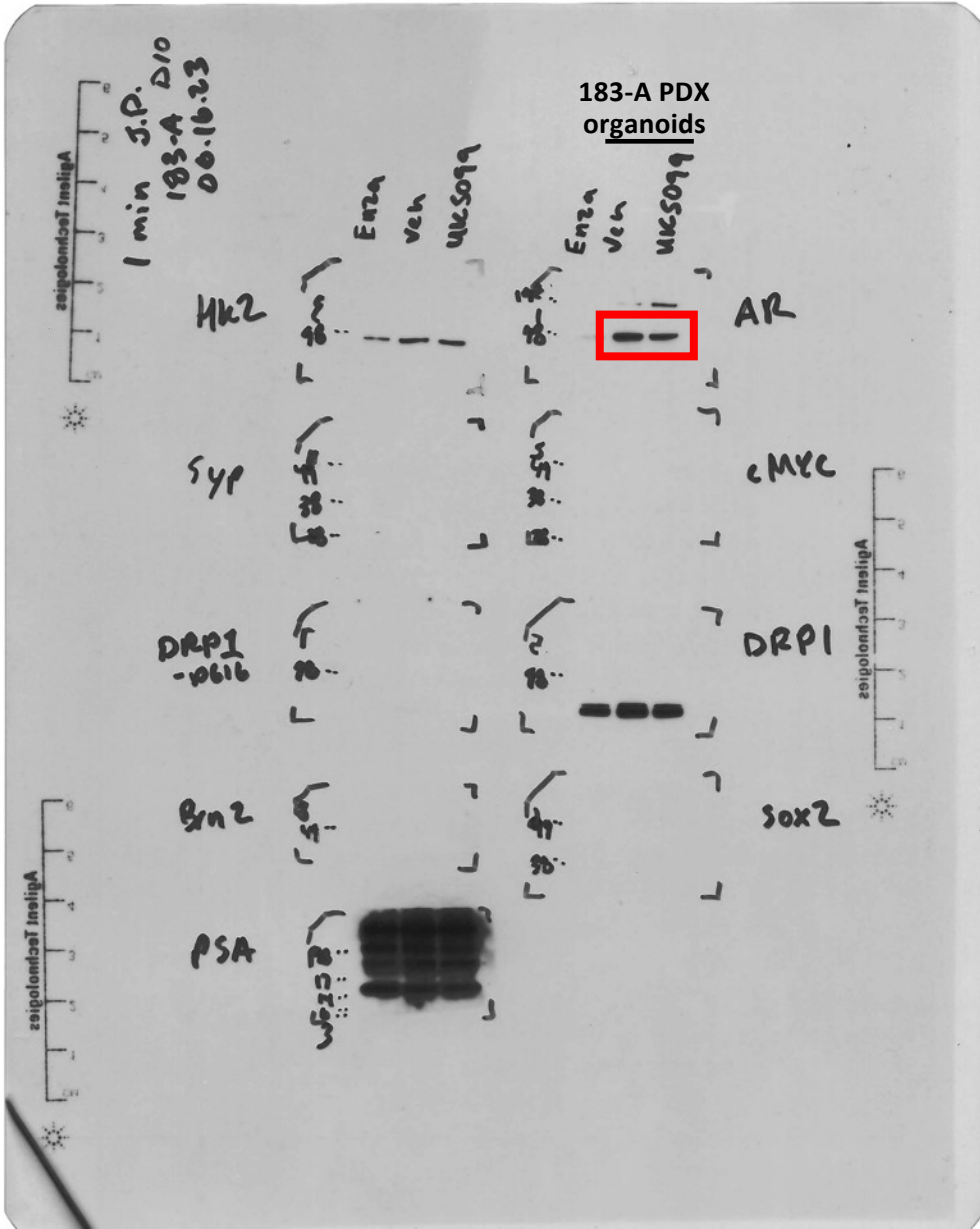

Extended Data Figure 6h

KRT8

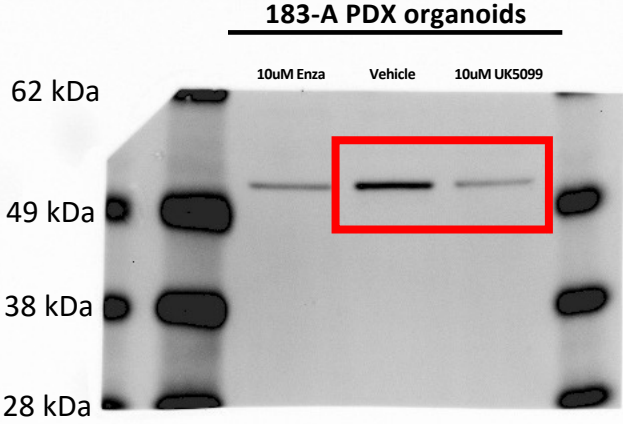

Extended Data Figure 6h

KRT18

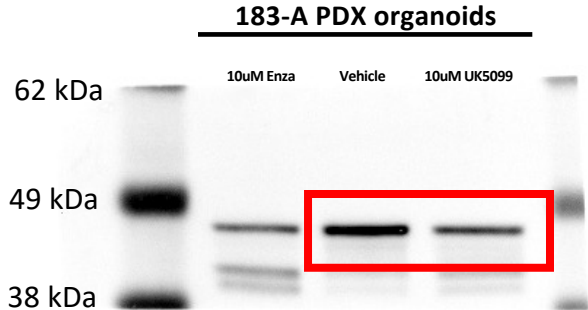

Extended Data Figure 6h

ACTIN

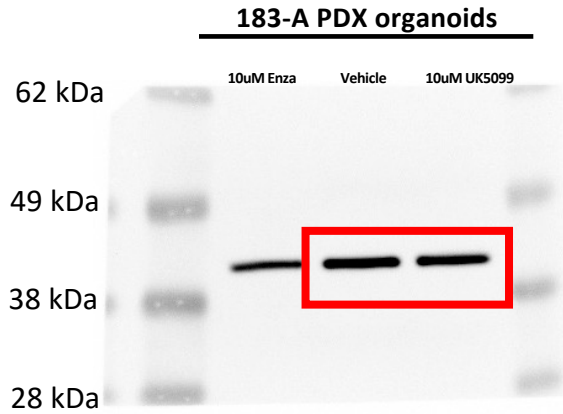

Extended Data Figure 6i

AR

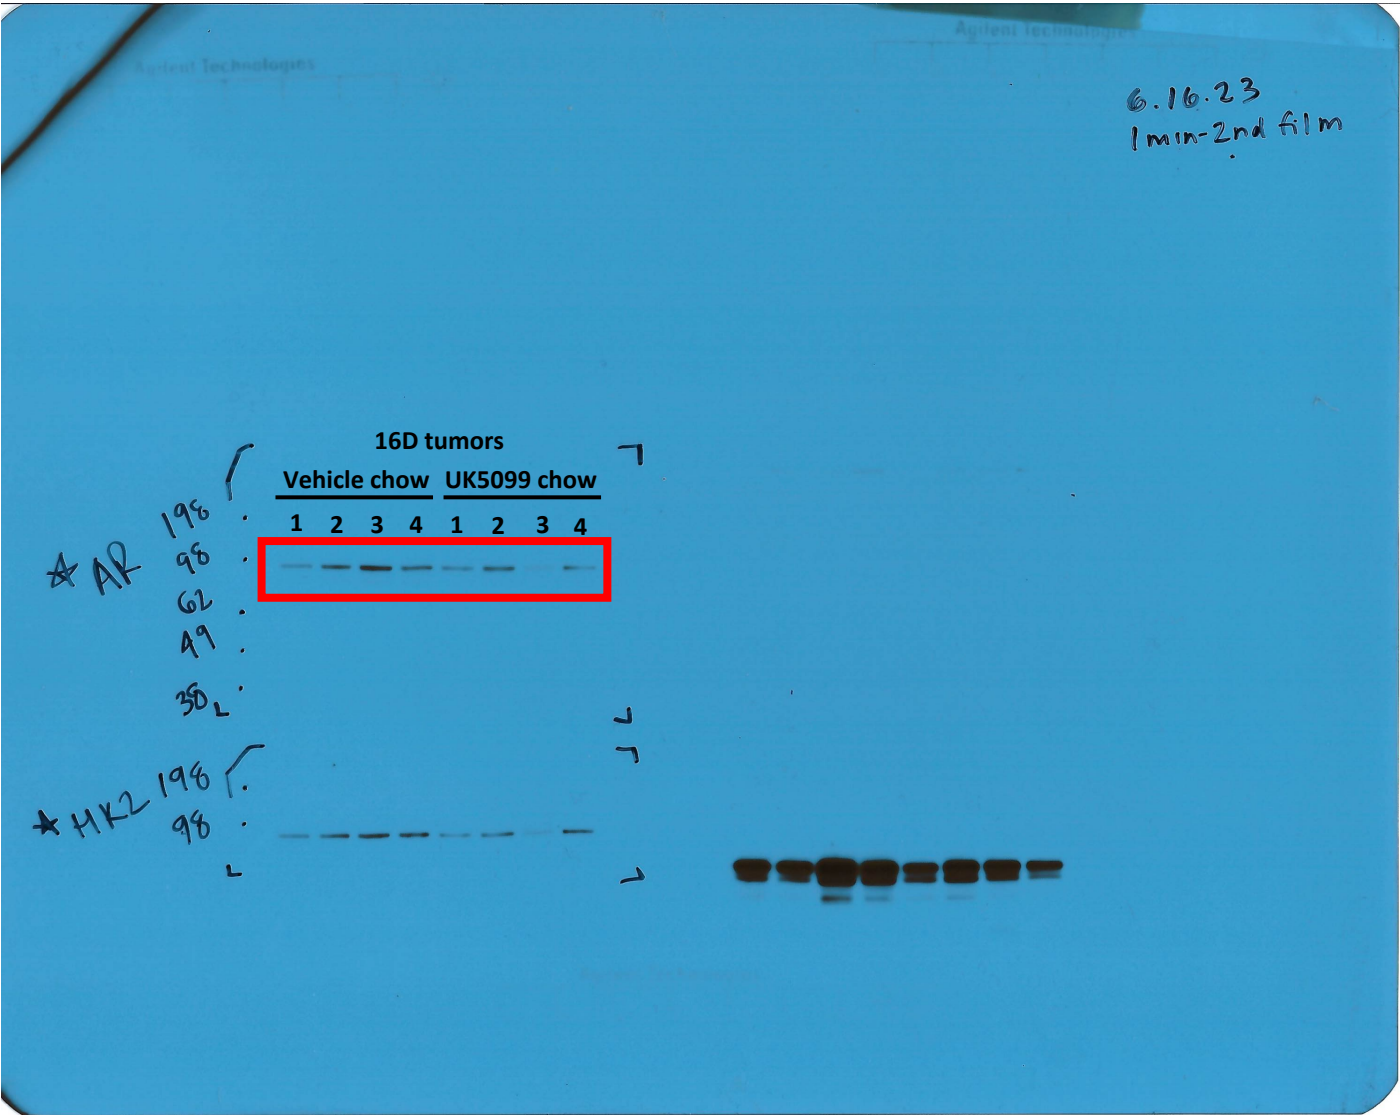



Extended Data Figure 6i

PSA

6.16.23  
1min-3rd film

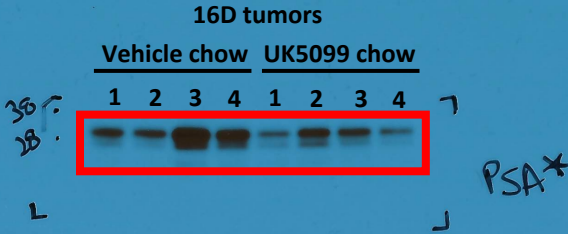

Extended Data Figure 6i

KRT8

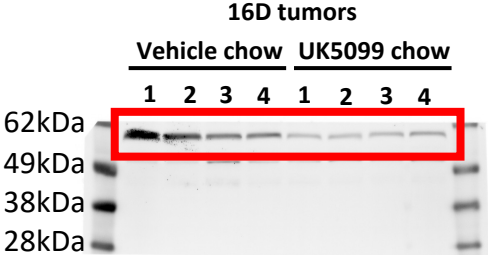

Extended Data Figure 6i

KRT18

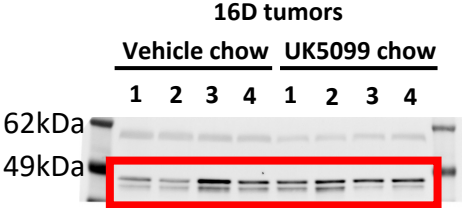

Extended Data Figure 6i

ACTIN

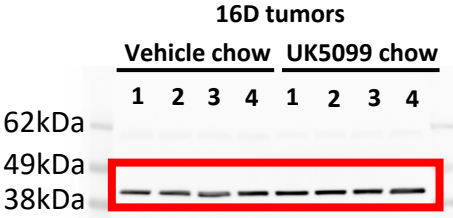

KRT8

12.14.22  
1 sec

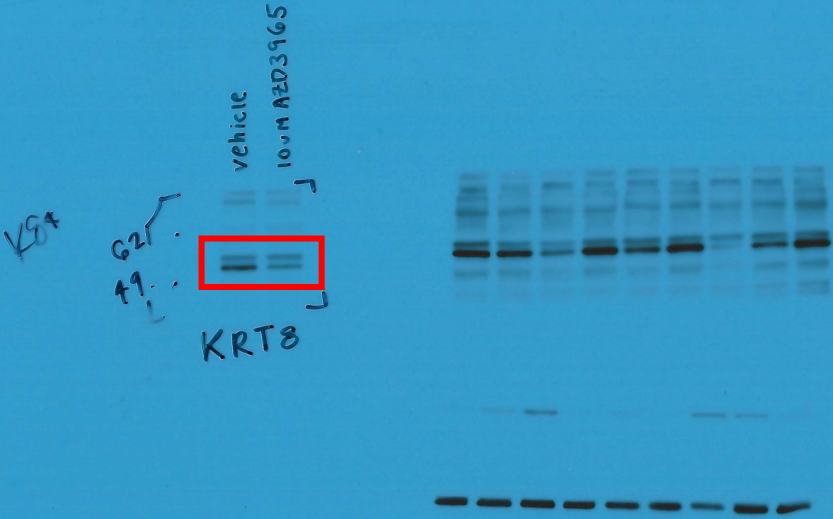

p63

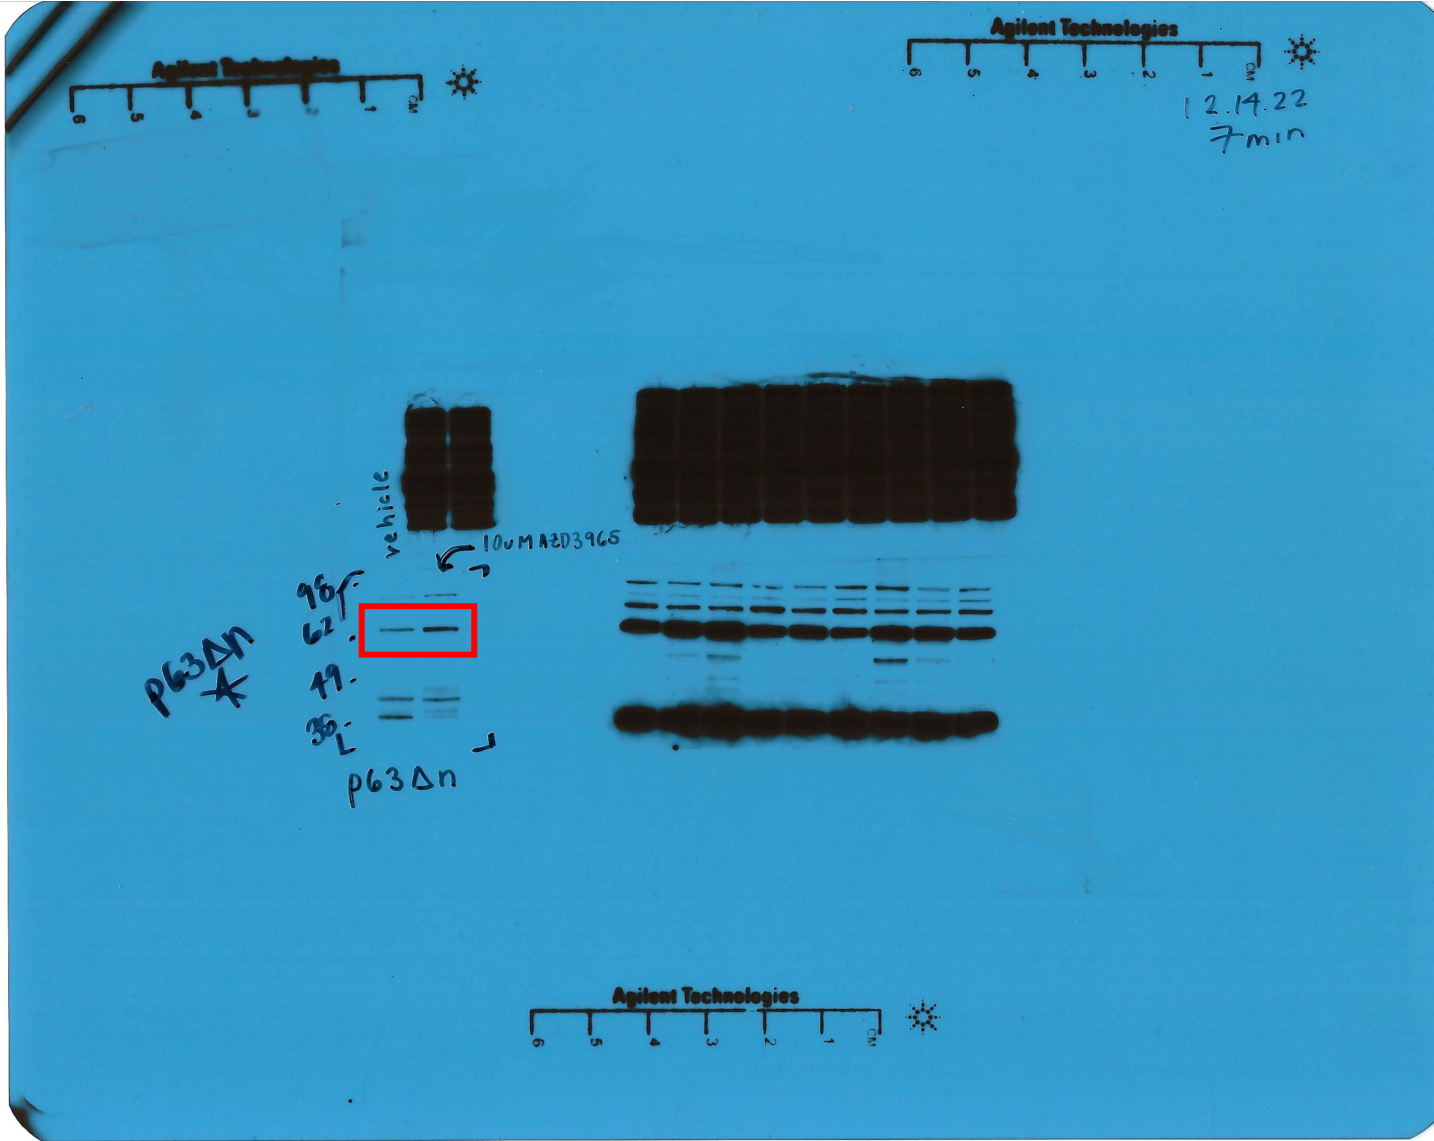



Extended Data Figure 7f

Actin

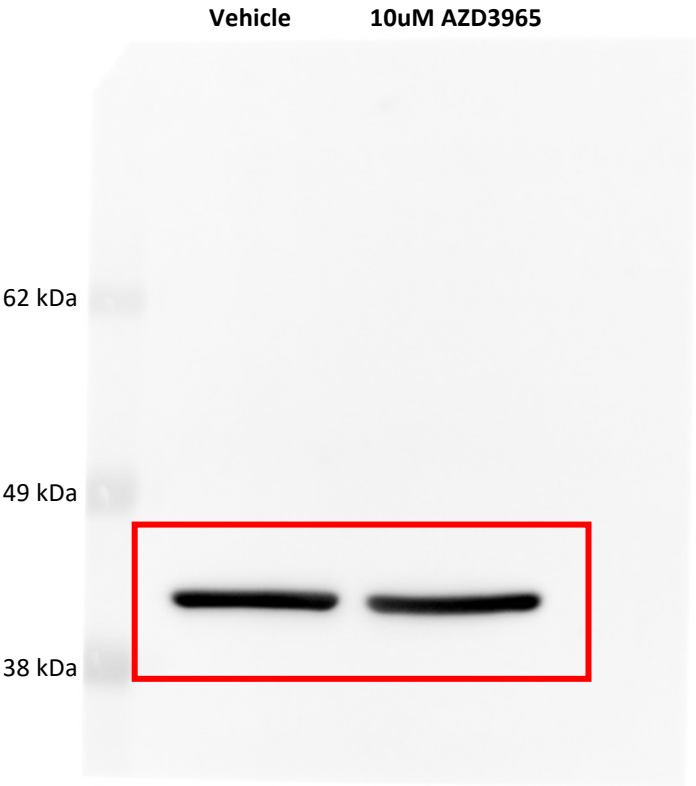

Extended Data Figure 7i

pan-Ac HH4

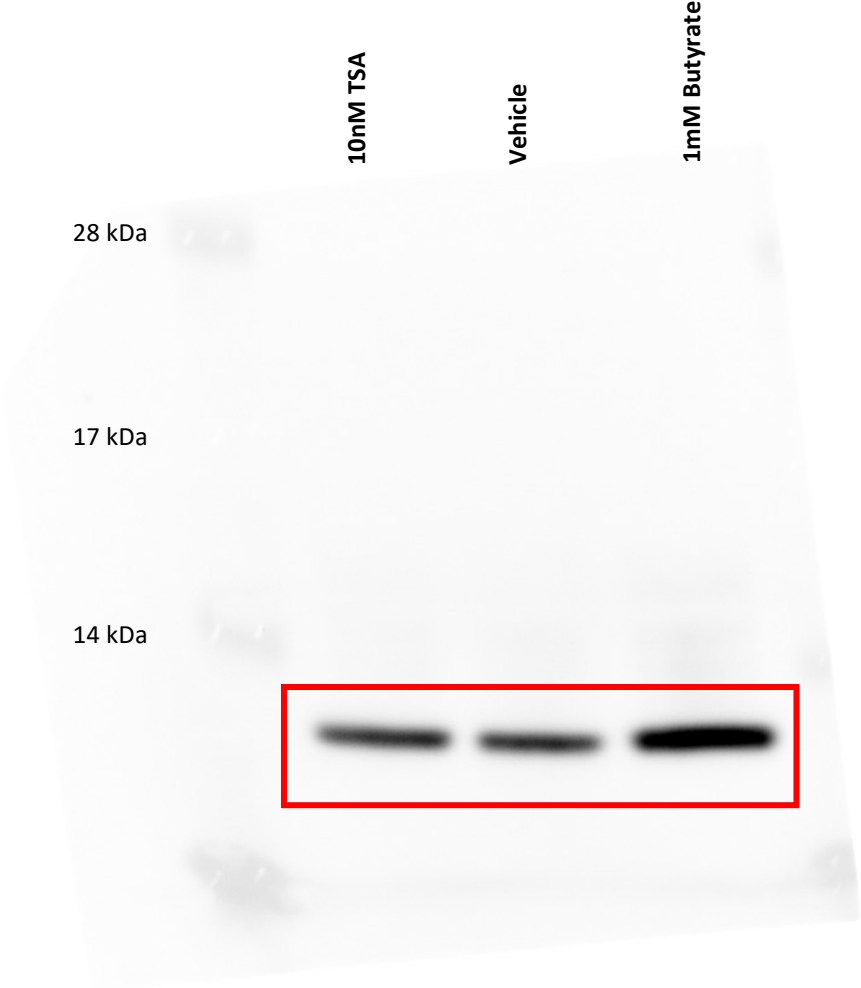

Extended Data Figure 7i

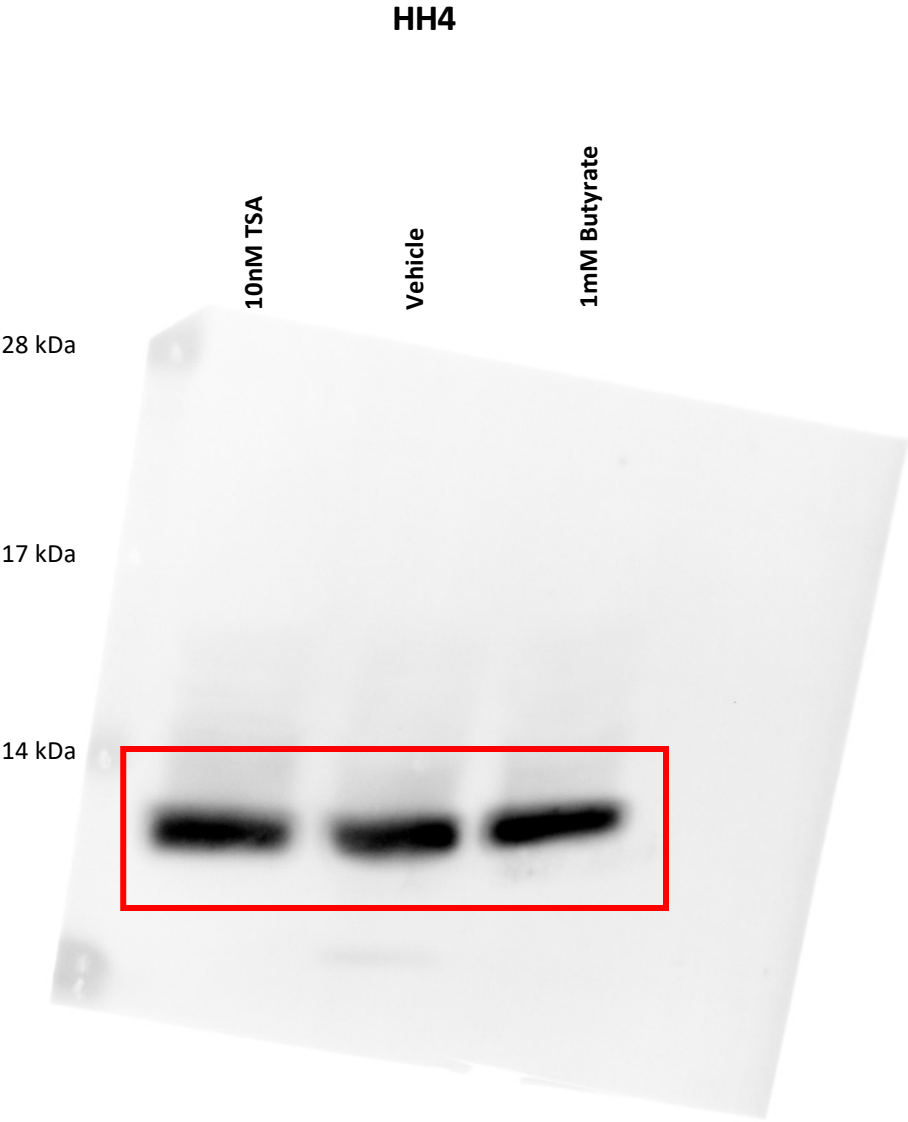

Extended Data Figure 7i

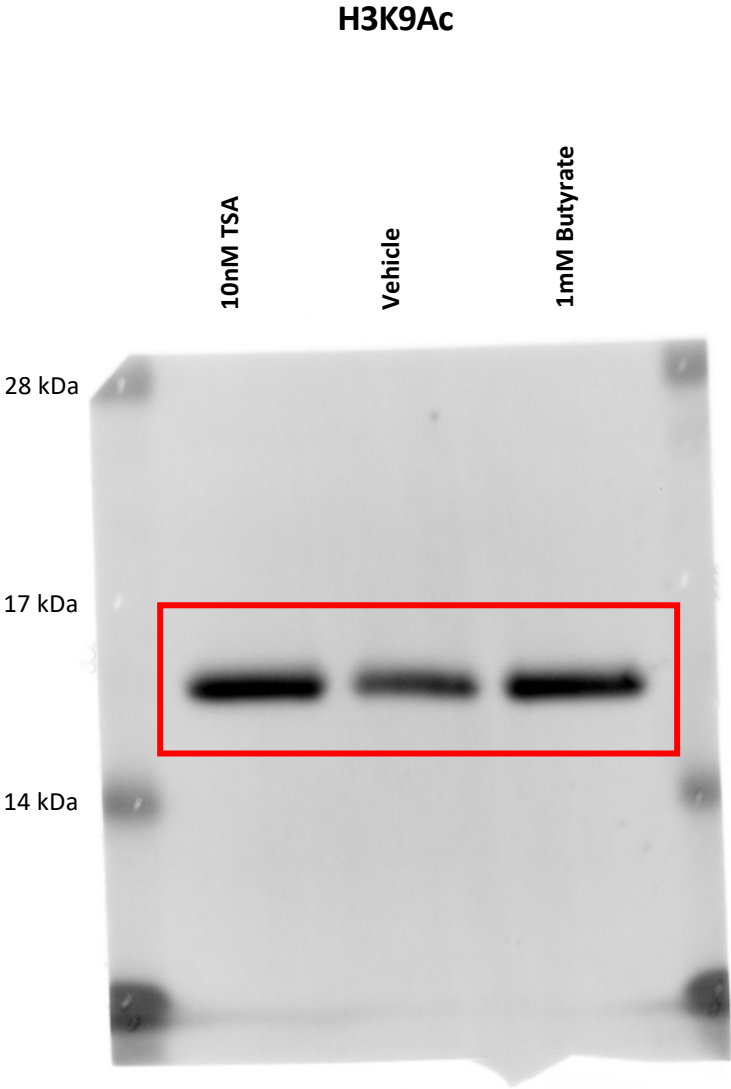

Extended Data Figure 7i

pan-Ac HH3

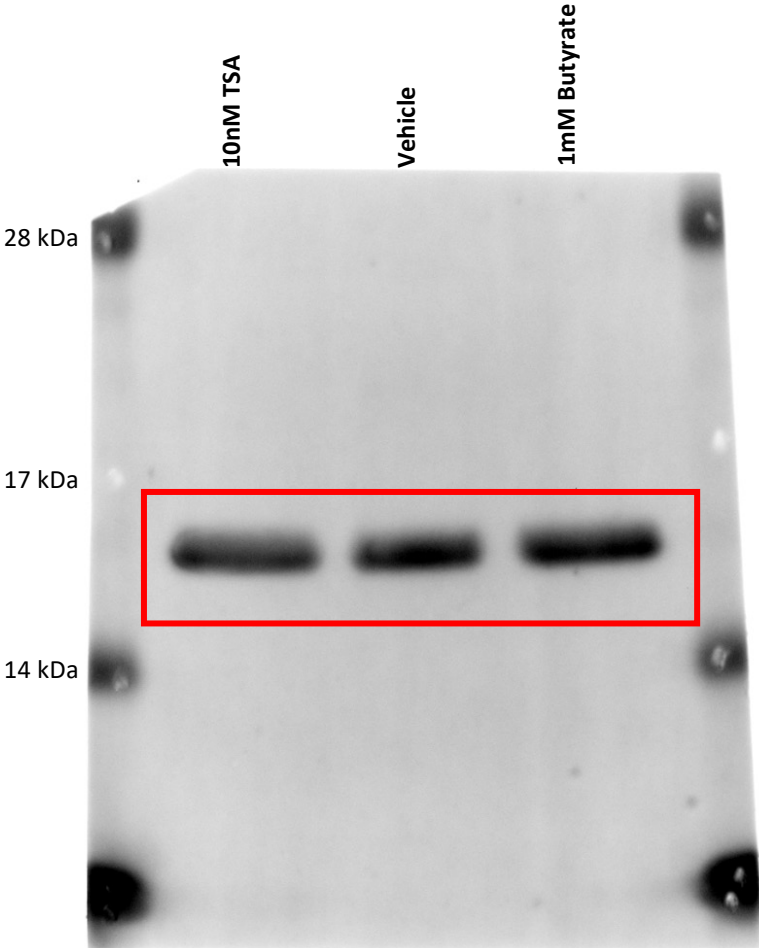

Extended Data Figure 7i

HH3

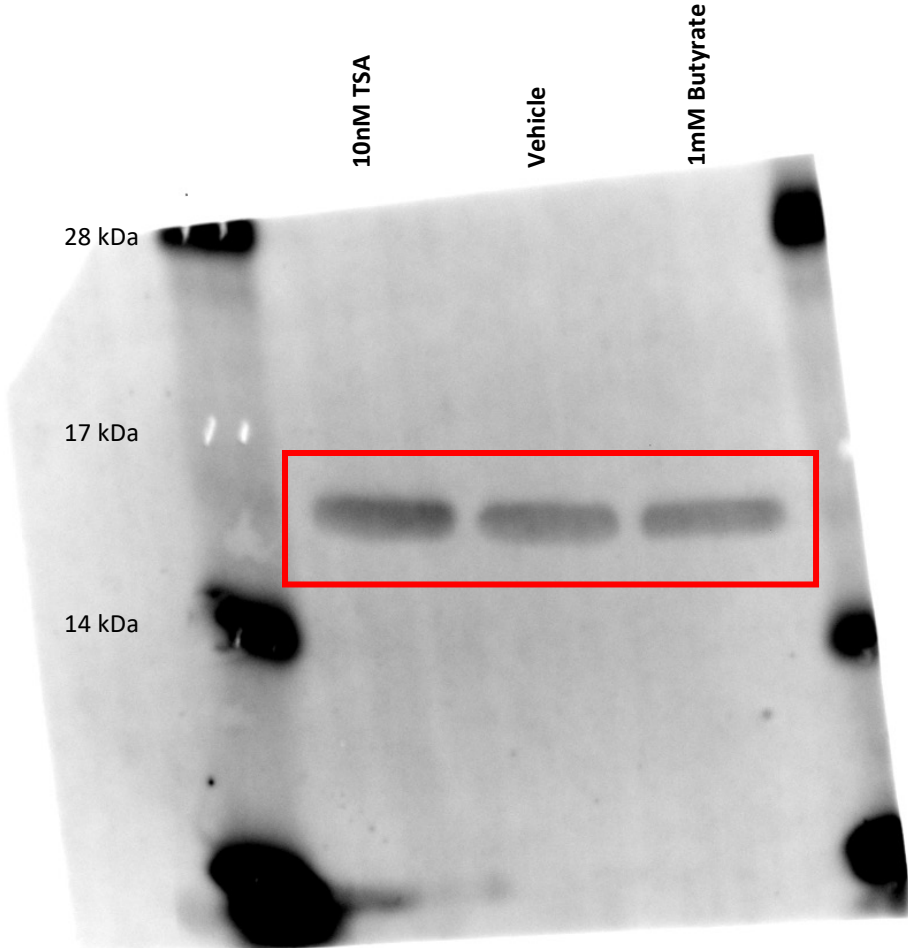

Extended Data Figure 10j

PSA

203-A PDX-derived organoids

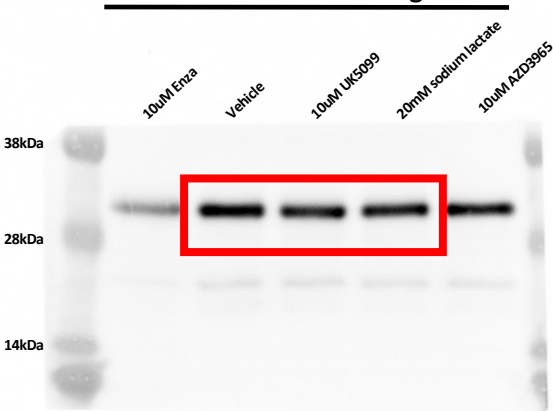



SYP

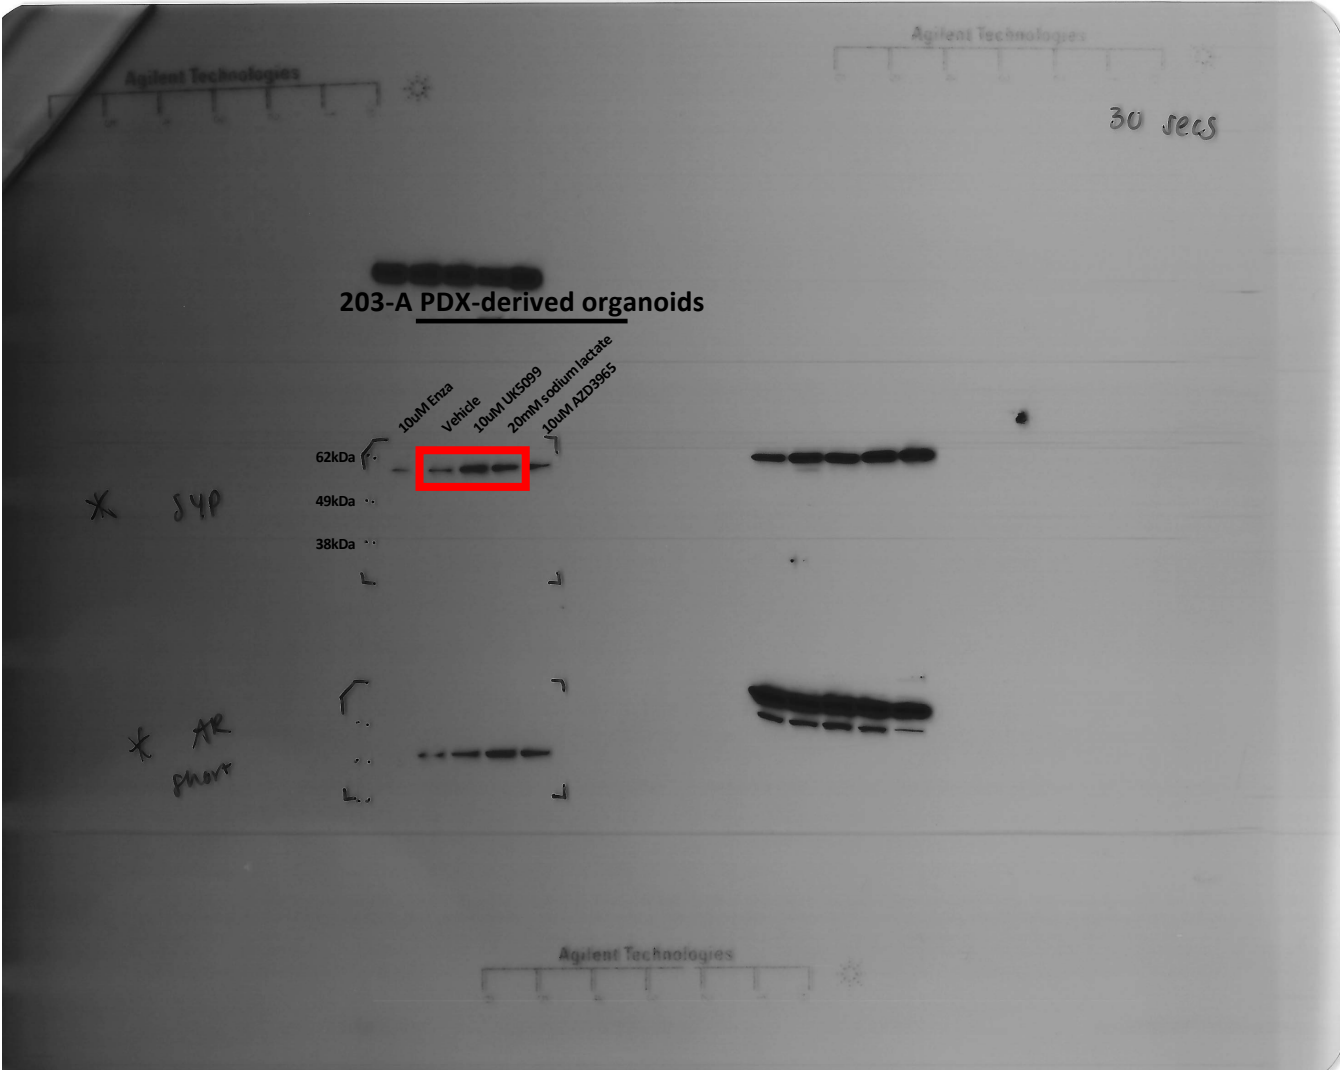

Extended Data Figure 10j

Actin

203-A PDX-derived organoids

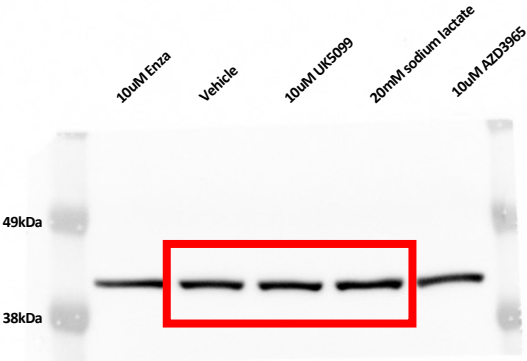

Supplement: 41556_2023_1274_MOESM4_ESM.pdf [file 41556_2023_1274_MOESM4_ESM.pdf]
